1 **Microglia and macrophages alterations in the CNS during acute SIV**  
2 **infection: a single-cell analysis in rhesus macaques**

3

4 Xiaoke Xu<sup>1</sup>, Meng Niu<sup>1</sup>, Benjamin G. Lamberty<sup>1</sup>, Katy Emanuel<sup>1</sup>, Andrew J. Trease<sup>1</sup>,  
5 Mehnaz Tabassum<sup>2</sup>, Jeffrey D. Lifson<sup>3</sup>, and Howard S. Fox<sup>1\*</sup>

6

7 <sup>1</sup>Department of Neurological Sciences, University of Nebraska Medical Center,  
8 Omaha, Nebraska, USA

9 <sup>2</sup>Department of Pathology, Microbiology, and Immunology, University of Nebraska  
10 Medical Center, Omaha, Nebraska, USA

11 <sup>3</sup>AIDS and Cancer Virus Program, Frederick National Laboratory, Frederick, Maryland,  
12 USA.

13

14 \*Corresponding author

15 E-mail: [hfox@unmc.edu](mailto:hfox@unmc.edu) (HSF)

16

17 Running title: Microglia and macrophage responses to acute SIV infection *in vivo*

18 **ABSTRACT**

19 Human Immunodeficiency Virus (HIV) is widely acknowledged for its profound impact  
20 on the immune system. Although HIV primarily affects peripheral CD4 T cells, its  
21 influence on the central nervous system (CNS) cannot be overlooked. Within the brain,  
22 microglia and CNS-associated macrophages (CAMs) serve as the primary targets for  
23 HIV, as well as for the simian immunodeficiency virus (SIV) in nonhuman primates.  
24 This infection can lead to neurological effects and the establishment of a viral  
25 reservoir. Given the gaps in our understanding of how these cells respond *in vivo* to  
26 acute CNS infection, we conducted single-cell RNA sequencing (scRNA-seq) on  
27 myeloid cells from the brains of three rhesus macaques 12-days after SIV infection,  
28 along with three uninfected controls. Our analysis revealed six distinct microglial  
29 clusters including homeostatic microglia, preactivated microglia, and activated  
30 microglia expressing high levels of inflammatory and disease-related molecules. In  
31 response to acute SIV infection, the population of homeostatic and preactivated  
32 microglia decreased, while the activated and disease-related microglia increased. All  
33 microglial clusters exhibited upregulation of MHC class I molecules and interferon-  
34 related genes, indicating their crucial roles in defending against SIV during the acute  
35 phase. All microglia clusters also upregulated genes linked to cellular senescence.  
36 Additionally, we identified two distinct CAM populations: CD14<sup>low</sup>CD16<sup>hi</sup> and  
37 CD14<sup>hi</sup>CD16<sup>low</sup> CAMs. Interestingly, during acute SIV infection, the dominant CAM  
38 population changed to one with an inflammatory phenotype. Notably, specific  
39 upregulated genes within one microglia and one macrophage cluster were associated  
40 with neurodegenerative pathways, suggesting potential links to neurocognitive  
41 disorders. This research sheds light on the intricate interactions between viral

42 infection, innate immune responses, and the CNS, providing valuable insights for  
43 future investigations.

44

45 **Keywords:** HIV, SIV, neuroHIV, microglia, macrophages, scRNA-seq

46

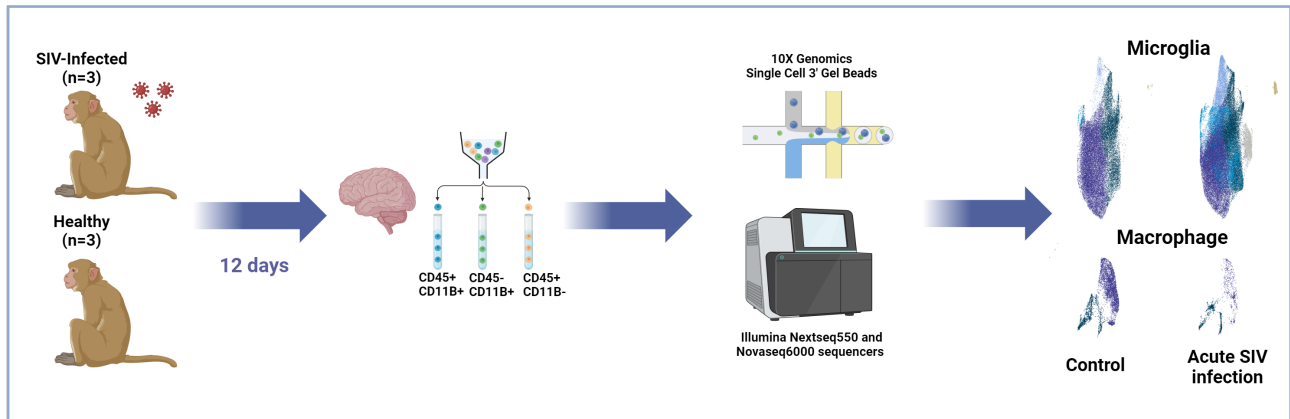

47

## 48 AUTHOR SUMMARY

49 HIV's entry into the central nervous system (CNS) can lead to neurological  
50 dysfunction, including HIV-associated neurocognitive disorders (HAND), and the  
51 establishment of a viral reservoir. While microglia and CNS-associated macrophages  
52 (CAMs) are the primary targets of HIV in the CNS, their responses during acute HIV  
53 infection remain poorly defined. To address this, we employed the scRNA-seq  
54 technique to study microglial and CAM populations in rhesus macaques during acute  
55 SIV infection. By identifying signature genes associated with different phenotypes and  
56 mapping them to various biological and pathological pathways, we discovered two  
57 myeloid cell clusters strongly linked to neurodegenerative disorders. Additionally,  
58 other clusters were associated with inflammatory pathways, suggesting varying  
59 degrees of activation among different myeloid cell populations in the brain, possibly  
60 mediated by distinct signaling pathways. All microglia clusters developed signs of the  
61 cellular senescence pathway. These findings shed light on the immunological and  
62 pathological effects of different myeloid phenotypes in the brain during acute SIV  
63 infection, providing valuable insights for future therapeutic strategies targeting this  
64 critical stage and aiming to eliminate the viral reservoir.

## 65 INTRODUCTION

66 The human immunodeficiency virus (HIV) is an enveloped retrovirus that  
67 contains two copies of a single-stranded RNA genome, which can cause acquired  
68 immunodeficiency syndrome (AIDS) by significantly impairing the immune system.  
69 HIV remains a global health challenge with profound implications for individuals,  
70 communities, and societies. The estimated number of people with HIV (PWH) is 36.7  
71 million worldwide as of 2016, and according to the latest epidemiology study in 2020,  
72 PWH comprise approximately 1.2 million in the United States.<sup>(1)</sup> Similar to HIV in  
73 genomic, structural, and virologic perspectives, the simian immunodeficiency virus  
74 (SIV) also belongs to the primate retrovirus family. *In vivo*, both viruses cause  
75 persistent infection. Infection of nonhuman primates (NHPs) by SIV mimics many key  
76 aspects of HIV infection in humans, including immunodeficiency, opportunistic  
77 infections, and CNS infection which can be associated with neurological impairments.  
78 (2-5)

79 The development of HIV infection can be classified into three stages, acute HIV  
80 infection, chronic HIV infection, and if untreated, eventually AIDS.<sup>(6)</sup> The acute  
81 infection period is defined as the stage immediately after HIV infection and before the  
82 development of antibodies to HIV, during which the virus rapidly multiplies and spreads  
83 throughout the body.<sup>(7)</sup> Sexually-mediated HIV transmission generally starts with  
84 mucosal CD4+ T cells and Langerhans cells,<sup>(8)</sup> and then travels to gut-associated  
85 lymphoid tissue (GALT). Intravenous infection-mediated HIV transmission leads to  
86 initial infection of CD4+ T cells in lymph nodes, the spleen, and GALT.<sup>(9, 10)</sup> Lymphoid  
87 tissue and other organ macrophages can also be infected. HIV-infected cells can  
88 produce large amounts of virus to infect additional target cells and can also migrate  
89 and carry the virus to other tissues and organs including the central nervous system

90 (CNS). The earliest post-infection time for detecting HIV/SIV RNA in the CNS (brain  
91 or cerebrospinal fluid) ranges from 4 days to 10 days.<sup>(11-13)</sup> Like the deteriorative effect  
92 of HIV in the periphery, the inflammatory events and neurotoxicity elicited by the  
93 HIV/SIV can damage neurons as well as other supportive cells in the brain which can  
94 eventually lead to HIV-associated neurocognitive disorders (HAND). While the  
95 extensive use of antiretroviral therapy (ART) has significantly reduced the occurrence  
96 of dementia, the most severe type of HAND, the overall prevalence of HAND still  
97 hovers around 50%.<sup>(14-17)</sup>

98 In CNS HIV/SIV infection, CNS-associated macrophages (CAMs) and microglia  
99 are thought to play a central role in defending against the invading pathogen and  
100 trigger neuroinflammation.<sup>(18, 19)</sup> Responding to the virus and/or virally-infected cells  
101 that enter the brain as the initial innate immune response, they are activated and can  
102 release numerous proinflammatory cytokines including interferons, IL-6, IL-1 $\beta$ , and  
103 TNF- $\alpha$  to contribute to the control and clearance of the virus or infected cells from the  
104 CNS.<sup>(11)</sup> However, macrophages and microglia can also contribute to the pathological  
105 events of HIV/SIV infection. In acute SIV/HIV infection, infected blood monocytes  
106 represent another cell type other than CD4+ T cell that has been proposed to seed the  
107 virus in the CNS. Infection of rhesus monkeys with SIV indeed results in an increase  
108 in monocytes trafficking to the brain.<sup>(20)</sup> Once trafficking monocytes enter the brain,  
109 they can further differentiate to CAMs, and under experimental conditions (such as  
110 depletion of CD8+ cells) can lead to rapid development of SIV encephalitis.<sup>(21)</sup> On the  
111 other hand, blocking of an integrin ( $\alpha$ 4), which is highly expressed on monocytes, by  
112 natalizumab was found to profoundly hinder CNS infection and ameliorate neuronal  
113 injury.<sup>(22)</sup> However integrin( $\alpha$ 4) is also expressed on CD4+ T cells, thus attributing the  
114 effect to monocytes is uncertain. Although microglia, which are the CNS-specific

115 resident myeloid cells, do not participate in bringing the HIV/SIV to the CNS, they are  
116 actively involved in neuronal damage once they are infected and/or activated. (14, 23, 24)  
117 In addition, infected CAMs and/or microglia are thought to make up a viral reservoir in  
118 the brain under suppressive ART treatment, complicating efforts for an HIV cure.

119 Although the general responses of microglia and CAMs to acute SIV infection  
120 has been widely studied by using bulk assays, our understanding of different microglial  
121 or CAMs phenotypes have is minimal for this important period in which virus enters  
122 the brain. In this study, we performed high-throughput single-cell RNA sequencing  
123 (scRNA-seq) on microglia and CAMs from the brains of rhesus macaques during acute  
124 SIV infection as well as in control uninfected animals to address the limitations of bulk  
125 assays and investigated the different effects of acute SIV infection on varied myeloid  
126 phenotypes. We identified homeostatic microglia, preactivated microglia, activated  
127 microglia, and two phenotypes of CAMs in the brains. We further characterized these  
128 subsets of cells by comparing their transcriptomic profiles in the uninfected and acute-  
129 infected conditions. Different responses were evoked in different microglial and  
130 macrophage phenotypes in acute SIV infection. Interestingly, there were two activated  
131 cell clusters that were found to be closely associated with neurological disorders.  
132 Finally, although we did not observe modulation of the expression of the anti-apoptotic  
133 molecule BCL-2 (upregulation of BCL-2 is one of the mechanisms for promoting the  
134 survival of infected cells) (25, 26) by SIV in microglia and CAMs, we found another anti-  
135 apoptotic molecule, CD5L was highly expressed in infected microglia which might be  
136 a novel potential pathway to elucidate the reservoir establishment in the CNS.

137

## 138 RESULTS

### 139 The constitution of the brain's myeloid cell population was altered by acute SIV 140 infection.

141 To examine the effect of acute SIV infection on brain myeloid cells, we  
142 inoculated three rhesus macaques with SIV<sub>mac251</sub>, and processed the brains at 12-  
143 days post-inoculation to enrich resident and infiltrating immune cells for scRNA-seq.  
144 Cells from three uninfected animals were similarly analyzed. In the infected animals,  
145 high viral loads were found in the plasma at this stage, and productive brain infection  
146 (high viral RNA/DNA ratios) was found (**Figure S1, Table S1**). Uniform Manifold  
147 Approximation and Projection (UMAP) visualization of the scRNA-seq data revealed  
148 that the transcriptional patterns of the cells purified from the brains of the six rhesus  
149 macaques (three uninfected and three acute SIV-infected) grouped in five distinct  
150 regions. Graph-based clustering revealed that two of those regions contained distinct  
151 clusters, whereas in the other three existed additional subclusters of cells, totaling  
152 fifteen separate clusters (**Figure 1A**).

153 After comparing the expression of different cell markers between those 15 cell  
154 clusters (**Figure 1B and Table S2**), we identified seven microglial clusters with high  
155 expression of microglial core genes (P2RY12, GPR34, and CX3CR1) within the main  
156 microglia cluster, and one separate cluster of microglia-like cells that also expressed  
157 high levels of major histocompatibility complex class II (MHC II) molecules. We also  
158 found two macrophage clusters, which had high expression of MHC II and S100  
159 molecules (MAMU-DRA, CD74, S100A6, and S100A4). In addition, we identified four  
160 T/NK cell clusters with high expression of the genes for T cell co-receptors,  
161 granzymes, and NK cell granule proteins (CD3D, GZMB, and NKG7), and one B cell  
162 cluster with high expression of B cell markers (EBF1 and MS4A1). The scope of this



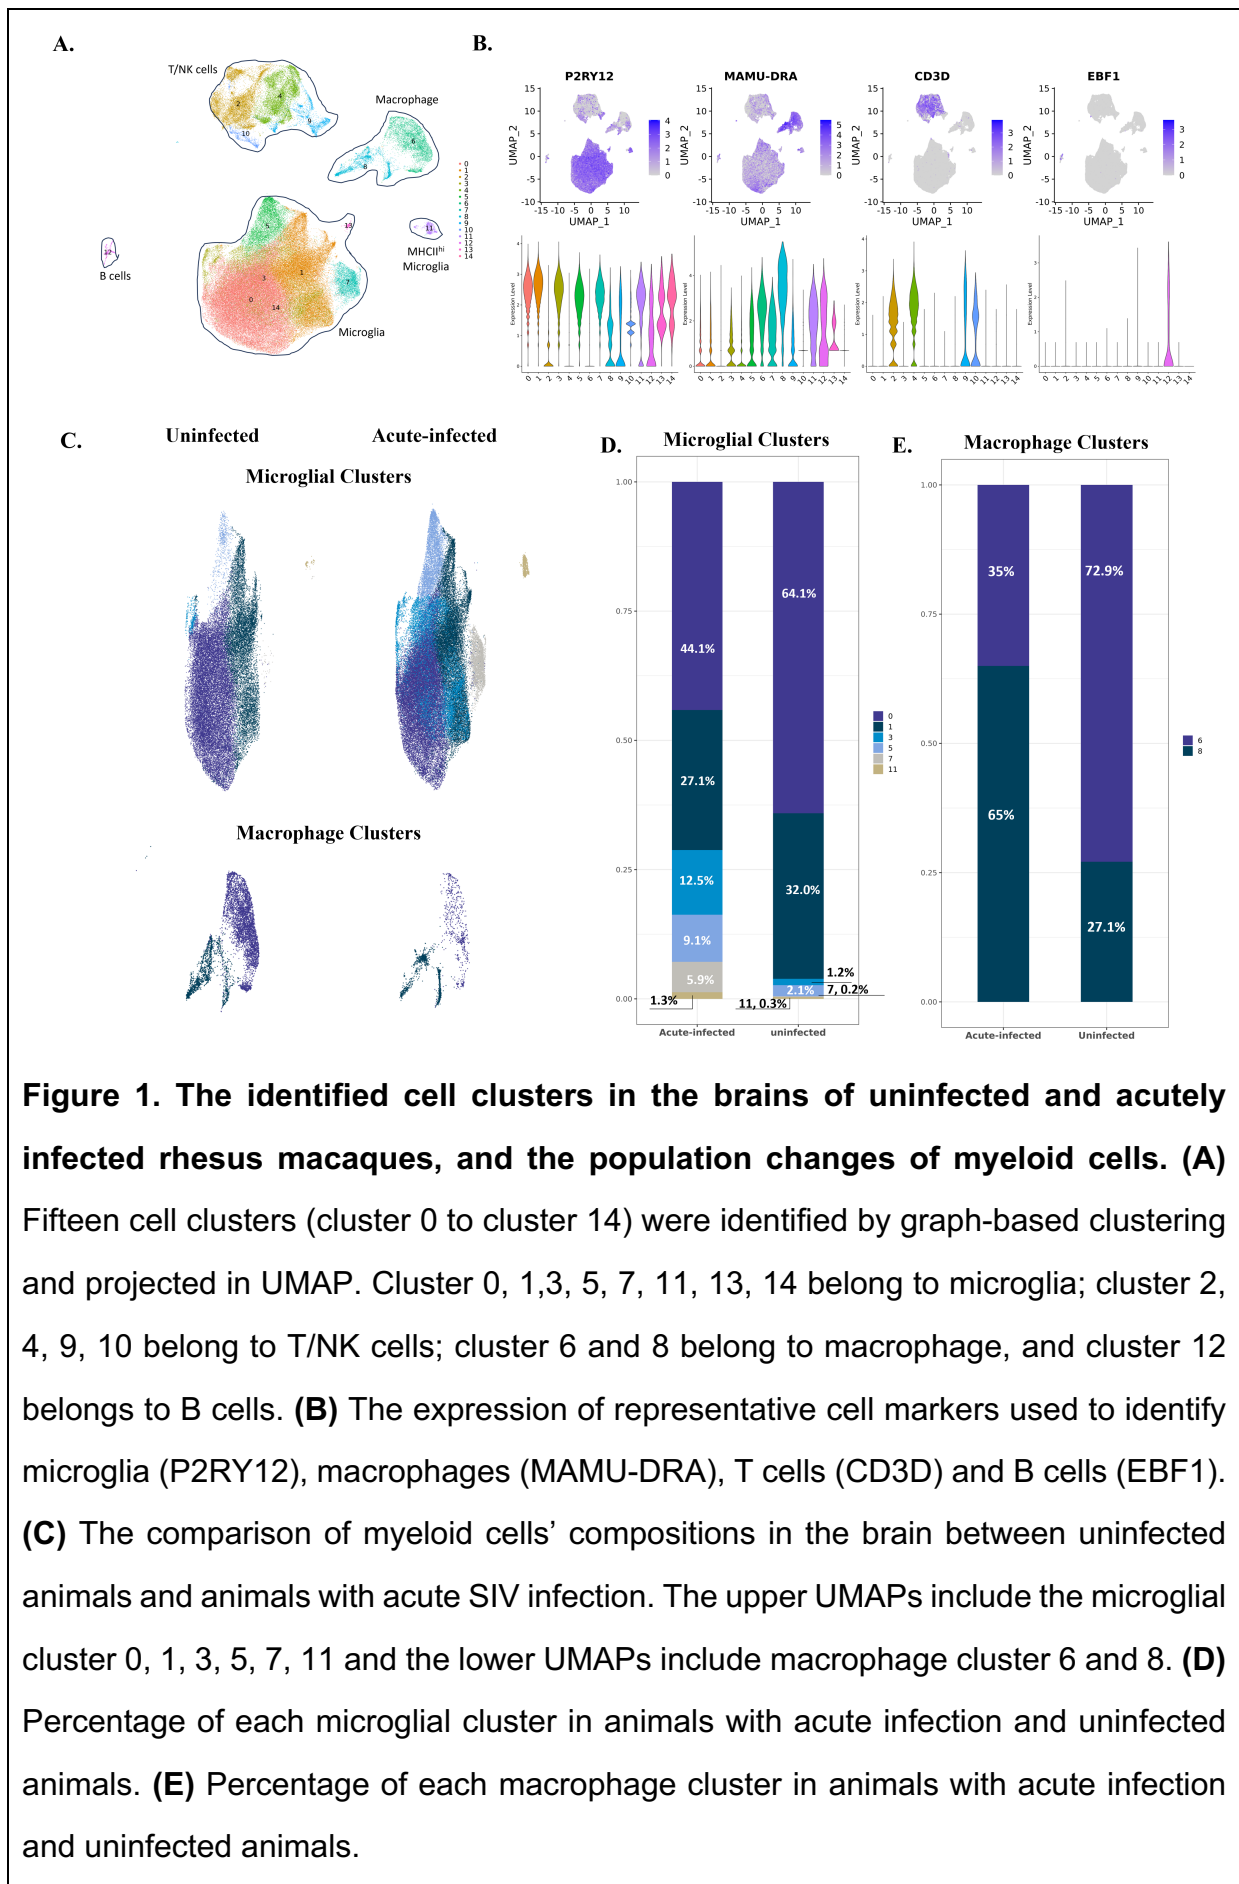

163

164

165

166

167

168

169

170

171

172

173

174

175

176

**Figure 1. The identified cell clusters in the brains of uninfected and acutely infected rhesus macaques, and the population changes of myeloid cells. (A)** Fifteen cell clusters (cluster 0 to cluster 14) were identified by graph-based clustering and projected in UMAP. Cluster 0, 1, 3, 5, 7, 11, 13, 14 belong to microglia; cluster 2, 4, 9, 10 belong to T/NK cells; cluster 6 and 8 belong to macrophage, and cluster 12 belongs to B cells. **(B)** The expression of representative cell markers used to identify microglia (P2RY12), macrophages (MAMU-DRA), T cells (CD3D) and B cells (EBF1). **(C)** The comparison of myeloid cells' compositions in the brain between uninfected animals and animals with acute SIV infection. The upper UMAPs include the microglial cluster 0, 1, 3, 5, 7, 11 and the lower UMAPs include macrophage cluster 6 and 8. **(D)** Percentage of each microglial cluster in animals with acute infection and uninfected animals. **(E)** Percentage of each macrophage cluster in animals with acute infection and uninfected animals.

177 study is to investigate the myeloid cells in response to the acute SIV infection, so we  
178 only included the myeloid cells, microglia and CNS-associated macrophages (CAMs),  
179 for subsequent analyses.

180 We first assessed whether we could detect cells expressing SIV transcripts.  
181 Indeed, in both the microglia and CAM clusters, SIV-infected cells could be identified,  
182 in total 0.15% of these myeloid cells (**Table S1**). Given the sensitivity of scRNA-seq,  
183 this percentage may be artificially low due to false negatives. In the five regions of  
184 brain analyzed for SIV DNA from the three acutely infected monkeys, we found an  
185 average of 162 copies of the SIV proviral genome per million cells (**Figure S1, Table**  
186 **S1**). If one approximates brain macrophages and microglia as comprising 10% of CNS  
187 cells, this would imply that 0.16% of these cells are infected, quite similar to our finding  
188 of 0.15% of these cells with SIV transcripts. Thus, at least during the acute infection  
189 stage, it is likely that the level of expression from the viral genome is sufficient to be  
190 recognized in scRNA-seq experiments. Given the similarity in the proportion of cells  
191 with SIV DNA and SIV transcripts, it is likely that most infected cells are expressing  
192 SIV transcripts, consistent with the high SIV RNA to DNA ratio (**Figure S1, Table S1**).

193 We next examined whether the infected myeloid cells overall exhibited  
194 differences in their gene expression patterns. Other than SIV itself, only two genes  
195 (LOC100426197, a class I histocompatibility gene; and LOC693820, the 40S  
196 ribosomal protein S29) reached statistical significance for differential expression  
197 between the infected myeloid cells and uninfected ones in the acutely infected animals  
198 (**Table S3**). This is likely due to activation of even the uninfected cells in the infected  
199 animals, as comparing the SIV-positive cells to all the myeloid cells in the uninfected  
200 animals yielded 226 DEGs (**Table S3**). Confirming the effect of the acute infection on  
201 uninfected cells, when comparing these bystander uninfected cells from the acutely

202 infected animals to those in the uninfected animals, 428 DEGs were identified (**Table**  
203 **S3**). 182 DEGs were in common between the last two comparisons (**Figure S2**).

204 To better to assess how acute infection alters the myeloid populations, we then  
205 separately compared the different microglia and macrophage clusters between the  
206 acutely infected animals and the control uninfected animals. Cluster 13 and cluster 14  
207 were excluded for their low cell population (cluster 13 has 273 cells and cluster 14 has  
208 177 cells) and fewer identified markers other than microglial core genes (**Table S2**).  
209 Therefore, we did downstream analyses on the six microglial clusters (0: Micro-0, 1:  
210 Micro-1, 3: Micro-3, 5: Micro-5, 7: Micro-7, 11: Micro-11) and two macrophage clusters  
211 (6: Macro-6 and 8: Macro-8).

212 As described briefly above, the initial identification of cell phenotypes revealed  
213 that Micro-11 had a high expression of microglial core genes, but from the UMAP  
214 (**Figure 1A**), it did not aggregate with other microglial clusters. In addition, the cells in  
215 Micro-11 also had high expression of MHC class II molecules (**Figure 2A**). Even  
216 though MHC class II molecules typically are not highly expressed on the microglia cells  
217 compared with CAMs,<sup>(18)</sup> some of the microglial cells in white matter or under  
218 pathological conditions might have higher expression.<sup>(27-29)</sup> Thus we included this  
219 cluster in the analyses for microglia instead of CAM.

220 Comparing the microglial constituents between the uninfected and infected  
221 animals (**Figure 1C and Figure 1D**), we found that Micro-0 and Micro-1 decreased  
222 their proportions under acute SIV infection, which was compensated by the increased  
223 proportions of microglial cells from other four clusters. Furthermore, this increase in  
224 acute infection was more remarkable for Micro-3 and Micro-7, each increasing at least  
225 10-fold, suggesting those two clusters were highly reactive to the infection. For the

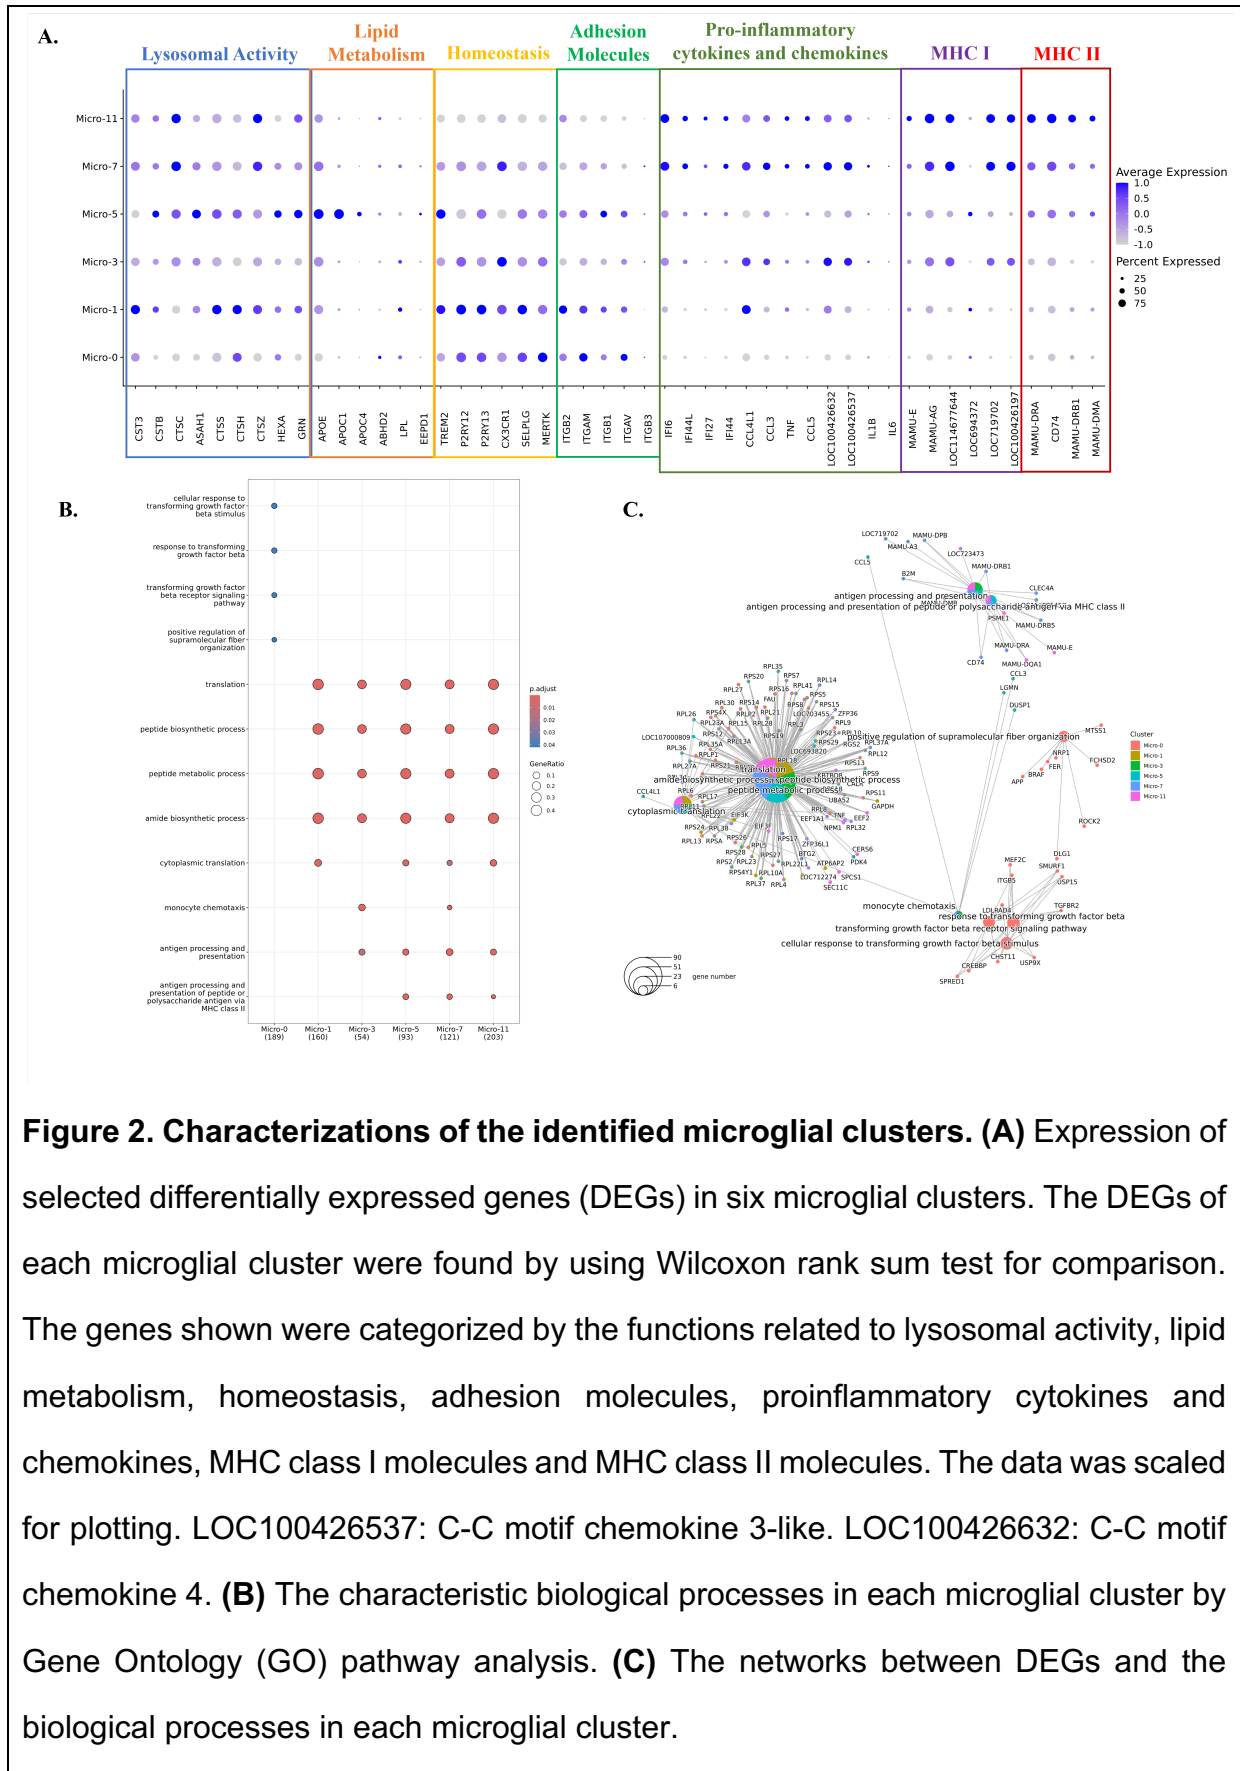

226

227

228

229

230

231

232

233

234

235

236

237 macrophage clusters, Macro-6 was the predominant macrophage population  
238 comparing to Macro-8 in the brains of uninfected animals (1.9-fold higher), however,  
239 this pattern was switched during SIV infection (**Figure 1C and Figure 1E**). There was  
240 a 3.5-fold higher population of Macro-8 over Macro-6 in animals with acute SIV  
241 infection, suggesting important roles of Macro-8 in reacting to early viral invasion.

242 **The increased microglial populations in acute SIV infection were activated**  
243 **microglia but they have different activation patterns and pathways.**

244 To better understand the factors behind the changes in microglial populations  
245 during acute SIV infection, we further characterized the clusters. We initially compared  
246 them regarding the expression of lysosomal proteins, lipid-metabolic proteins,  
247 homeostatic molecules, integrins, pro-inflammatory cytokines, chemokines, MHC  
248 class I and MHC class II molecules for their important roles in the immune surveillance  
249 and maintaining homeostasis of CNS (**Figure 2A**). These included commonly reported  
250 homeostatic genes of microglia include purinergic receptors (P2RY12 and P2RY13),  
251 fractalkine receptor (CX3CR1), selectin P (SELPLG), triggering receptor expressed on  
252 myeloid cells (TREM2), and tyrosine-protein kinase MER (MERTK). Micro-0 and  
253 Micro-1 had higher expression of these genes compared with the other four microglial  
254 clusters, indicating they were less likely to be associated with activation and  
255 inflammation. However, compared with Micro-0, Micro-1 had enhanced lysosomal  
256 activities and higher expression of some inflammatory molecules (APOE, CCL3 and  
257 CCL4), suggesting it might be in a slightly more activated, or preactivated state. Micro-  
258 3 and Micro-5 both had lower expression of homeostatic genes than Micro-0 and  
259 Micro-1, and higher expression of genes associated with microglial activation. Micro-  
260 3 highly expressed chemokines CCL3, CCL4 and MHC class I molecules, and Micro-  
261 5 highly expressed lysosomal proteins, apolipoproteins (APOE, APOC1 and APOC4)

262 and MHC class II molecules, which suggested that both Micro-3 and Micro-5 might be  
263 the activated, or response to infection, potentially disease-related microglia. Given that  
264 more inflammatory molecules and cytokines were highly expressed, and the  
265 homeostatic genes were rarely expressed in Micro-7 and Micro-11, those two  
266 microglial clusters might be in a higher activated state. However, Micro-11 had higher  
267 expression of MHC class II molecules with lower expression of homeostatic genes,  
268 suggesting it might be the most activated microglial population. Thus, in concert with  
269 our findings above the proportion of homeostatic microglia decreases, whereas the  
270 proportion of activated microglia increases, during acute SIV infection.

271 We then implemented GO analyses with the DEGs in each microglial cluster to  
272 assess biologic functionalities (**Figure 2B and 2C**). Micro-0 was identified with the  
273 pathways associated with transforming growth factor beta (TGF $\beta$ ), which further  
274 confirmed the homeostatic status of this microglial cluster.<sup>(30)</sup> The other five microglial  
275 clusters were all active in the translation and biosynthesis, but Micro-3, Micro-5, Micro-  
276 7 and Micro-11 had additional pathways related to microglial activation, such as  
277 antigen-presenting ability in MHC class I or MHC class II manner and chemotactic  
278 ability. However, the activated microglia clusters appeared specialized in different  
279 inflammatory or activation pathways, suggesting the heterogeneity of the activated or  
280 pathogenic microglial phenotypes in the brain. In summary, these results indicated that  
281 Micro-0 represented homeostatic microglia, Micro-1 might be a preactivated cluster  
282 with more activities in protein translation and lysosomal functions, and the other four  
283 clusters were the activated microglia with upregulation of different inflammatory  
284 molecules and pathways.

285 **Genes and pathways related to the MHC class I and type I interferon production**  
286 **were upregulated in all microglial clusters responding to the acute SIV infection.**

287 In the characterization of the microglial clusters above, we found one  
288 homeostatic cluster, one preactivated microglial cluster and four activated clusters.  
289 Although the cells from uninfected animals and infected animals were aggregated  
290 together for clustering, they still differ in the expression of some genes. Therefore, we  
291 identified the genes that were significantly upregulated in each microglial cluster due  
292 to acute SIV infection (**Table S4**). More upregulated genes with high fold-change in  
293 acute SIV infection were found in activated clusters Micro-3 and Micro-11, where the  
294 average expression of the genes associated with activated microglia were low in  
295 uninfected animals (**Figure 3A**). Therefore, for those two clusters, it might be that only  
296 the microglial cells from infected animals were truly activated microglia. For the other  
297 activated or preactivated microglial clusters, the cells from uninfected animals did have  
298 higher expression of the genes associated with activated microglia compared with the  
299 homeostatic cluster Micro-0, and those clusters further upregulated the expression of  
300 those activation genes in responses to acute SIV infection.

301 To better understand the changes in individual microglial clusters during acute  
302 SIV infection, we did a comparison between uninfected and acute infection samples  
303 for each microglial cluster (**Figure 3B**). We found that the genes that were related to  
304 MHC class I and interferon (IFN) signaling pathways were universally upregulated in  
305 microglial clusters during acute infection. It is well recognized that IFNs can block  
306 HIV/SIV replication,<sup>(31-33)</sup> and in this study we found that the key transcription factor in  
307 JAK-STAT pathway for IFN production, IRF9, was significantly upregulated in  
308 microglial cells. The increased fold-change of IRF9 ranged from 1.4 (Micro-11) to 8.3  
309 (Micro-3), indicating this molecule was extensively upregulated in acute SIV infection.  
310 Furthermore, the genes encoding type I interferon inducible proteins (IFI genes),  
311 especially IFI6, IFI27 and IFI44 were also significantly upregulated in all microglial

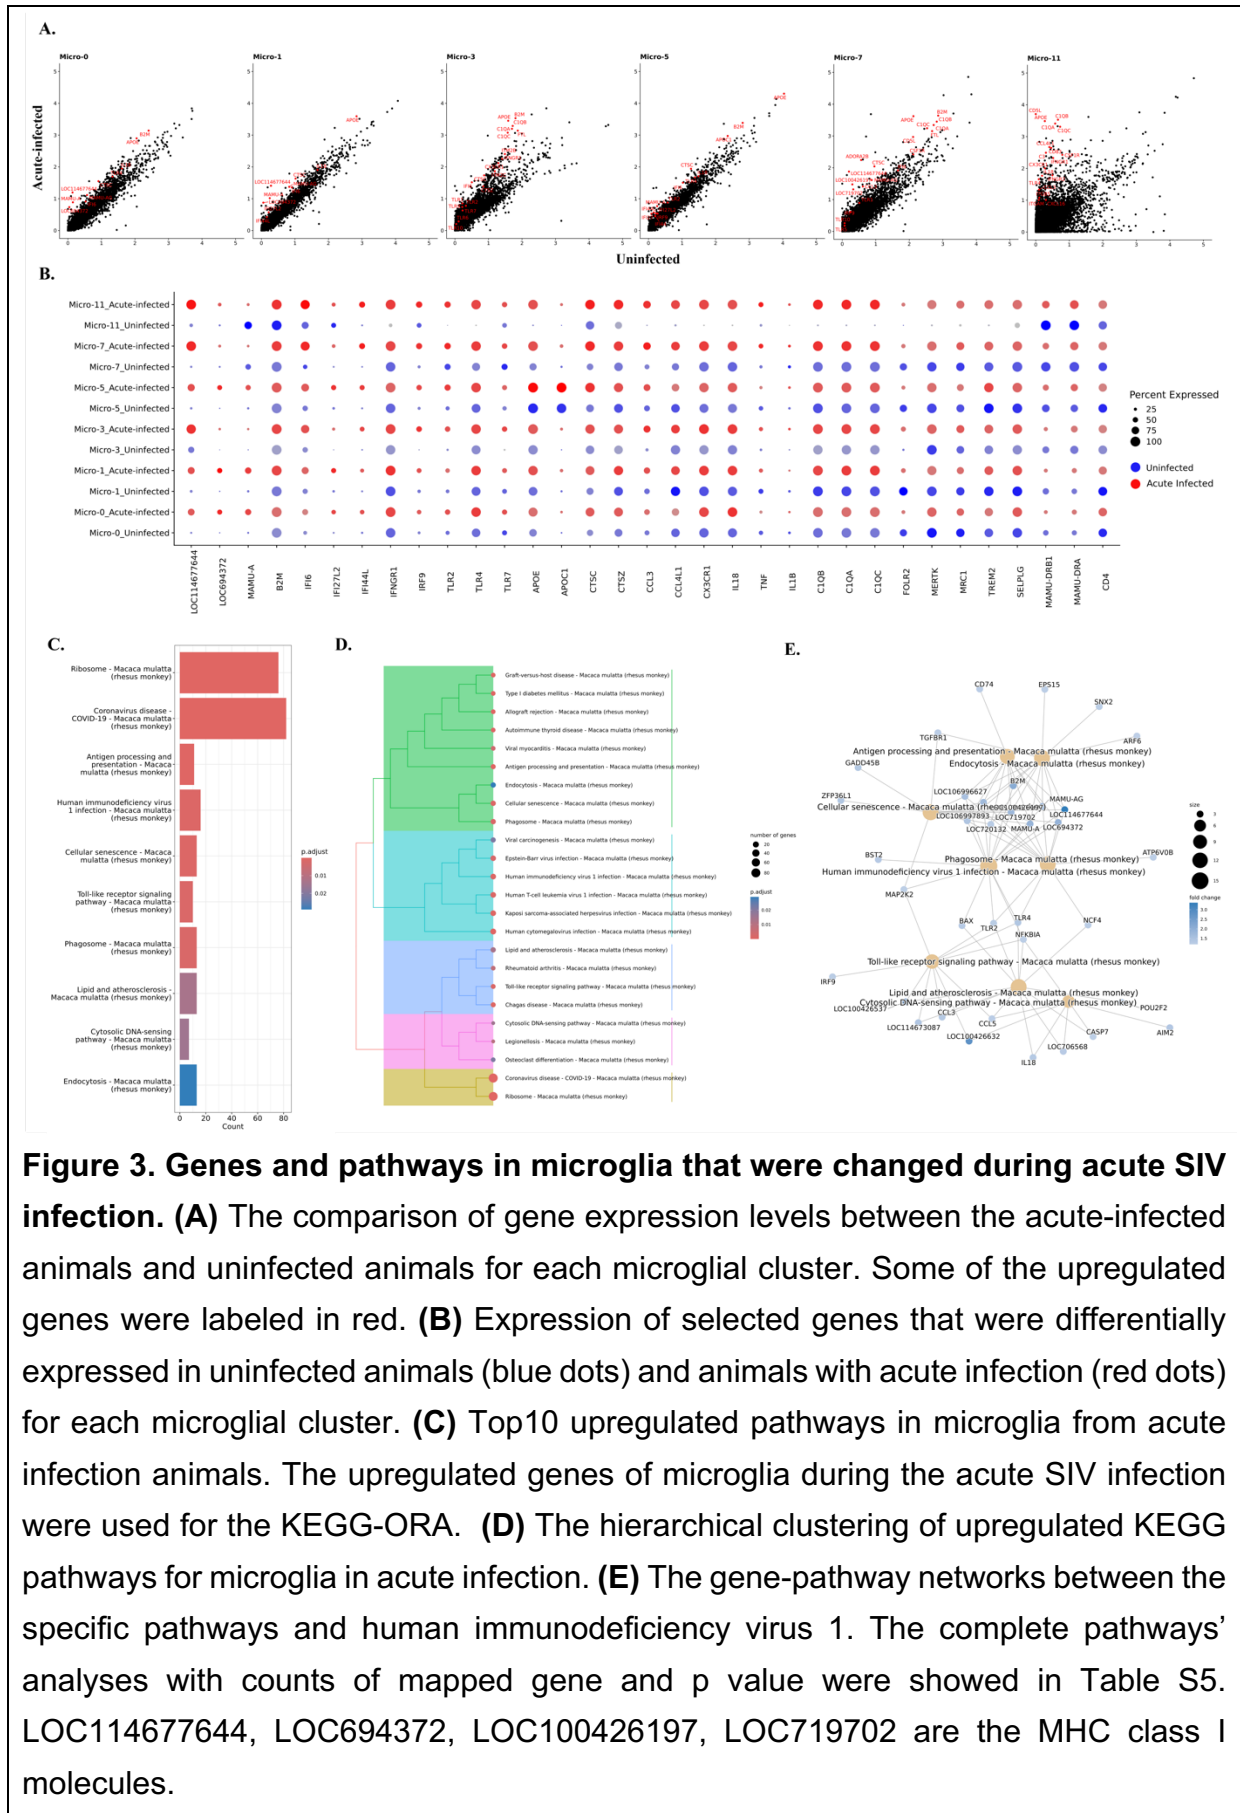

312

313

314

315

316

317

318

319

320

321

322

323

324

325



326 clusters. Those IFI genes are classified into interferon-stimulated genes (ISGs), which  
327 can be stimulated by the IFNs' signaling to augment the restriction of HIV/SIV  
328 replication and cell entry. In addition, we also found that the IFN $\gamma$  receptor (IFNGR1)  
329 was slightly increased in most microglial clusters (~1.1-fold change) and highly  
330 increased in Micro-11 cluster (4.5-fold change). Other upregulated genes included  
331 those encoding for apolipoproteins (e.g., APOE, APOC1), lysosomal proteins (e.g.,  
332 CTSC, CTSZ), complement components (e.g., C1QA, C1QB, C1QC), chemokines  
333 (e.g., CCL3, CCL4, CX3CR1), and proinflammatory cytokines (e.g., IL18, TNF, IL1B).  
334 Although most the aforementioned molecules were found to be upregulated in all  
335 microglial clusters, Micro-1, Micro-3, Micro-7, and Micro-11 were the clusters that had  
336 higher expression of those genes compared with Micro-0 and Micro-5 under acute SIV  
337 infection (**Figure S4A**). It should be noted that the Micro-5 cluster was found to have  
338 the highest expression of APOE and APOC in the uninfected condition as well as acute  
339 infection condition compared with other clusters (**Figure 3B**). APOE and APOC are  
340 also associated with neuroinflammation and neurodegeneration,<sup>(34)</sup> so their higher  
341 expression in Micro-5 indicated the activated nature of this cluster.

342 Surprisingly, different from the upregulated MHC class I molecules, the MHC  
343 class II molecules remained unchanged or downregulated for most microglial clusters.  
344 The downregulation of MHC class II molecules was more obvious in Micro-7 and  
345 Micro-11, in which the MHC class II molecules had higher expression than other  
346 clusters (**Figure 2A**). The other downregulated genes were related to  
347 immunoregulation and microglial homeostasis (e.g., MERTK, TREM2, MRC1, FOLR2,  
348 SELPLG). This downregulation was significant in Micro-0, Micro-1, Micro-5, and Micro-  
349 7, but for Micro-3 and Micro-11 these genes' expression was upregulated. When we  
350 compared the expression of these immunoregulatory or homeostatic molecules

351 between different microglial clusters in acute SIV infection, we found that their  
352 upregulation in Micro-3 leads this cluster to have higher expression of those genes  
353 compared with other clusters (**Figure S4A**). Intriguingly, CD4 gene expression was  
354 also downregulated in all microglial clusters (fold-change ranging from 1.1-1.3) and  
355 had highest expression in Micro-0 during the infection. CD4 serves as an important  
356 receptor for virus entry to the microglia<sup>(35)</sup> as well as the other targets of SIV/HIV  
357 infection, and its downregulation might indicate the defensive strategy of activated  
358 microglia in acute SIV infection. While CD4 downregulation by HIV and SIV infection  
359 of cells is known to occur through viral accessory proteins targeting the CD4 protein  
360 for degradation,<sup>(36)</sup> the downregulation of its transcript in all of the microglial clusters  
361 in acute infection likely is a result of cellular activation.

362 The genes that were significantly upregulated in microglial cells were then  
363 further associated with various pathways by using the Kyoto Encyclopedia of Genes  
364 and Genomes (KEGG) databases (**Figure 3C-3E**). All six clusters upregulated  
365 pathways related to antigen presentation and processing as well as cellular  
366 senescence. Micro-0 was found to upregulate the least number of pathological  
367 pathways compared with other microglial clusters (**Table S5**), which suggests that the  
368 homeostatic status in Micro-0 was least altered by acute SIV infection. The other five  
369 microglial clusters were associated with more disease-related pathways under acute  
370 infection (**Figure S3**). In general, these pathways could be categorized into five  
371 classes (**Figure 3D**), including pathways related to antigen processing and  
372 presentation, viral infections, inflammation, cytosolic DNA sensing, and ribosomal  
373 activities. In the category of viral infections, we found the HIV-1 infection pathway, with  
374 sixteen enriched genes. Most genes upregulated in the HIV-1 infection pathway

375 encoded MHC class I molecules, which connected the endocytosis, phagocytosis, and  
376 antigen presentation pathways to HIV-1 infection (**Figure 3E**).

377 The MEK2 protein kinase (MAP2K2) molecule, involved in mitogen-activated  
378 protein kinase (MAPK) pathway, also serves as the key molecule connecting cellular  
379 senescence and toll-like receptor (TLR) signaling with HIV-1 infection. MAP2K2 can  
380 trigger inflammation by phosphorylating the downstream kinases ERK1/2  
381 (Extracellular Signal-Regulated Kinases 1 and 2) to translocate the transcription factor  
382 NF- $\kappa$ B and AP-1 to the nucleus for the expression of the genes encoding cytokines.  
383 The TLRs utilize those pathways to induce the production of proinflammatory  
384 cytokines. By comparing different TLRs, we found that TLR4, which can induce the  
385 expression of type I IFNs, was upregulated in all microglial clusters (**Figure 3C**) during  
386 acute SIV infection. TLR2 signaling, also acting through NF- $\kappa$ B and AP-1 to produce  
387 proinflammatory molecules (such as TNF- $\alpha$ , IL-1 $\beta$ , and IL-6), was upregulated in most  
388 microglial clusters. TLR7 which, as opposed to the cell-surface location of TLR4 and  
389 TLR2 is located on the endosomal compartment of the cells, and can specifically  
390 recognize single strand RNA (ssRNA) of HIV/SIV for the production of type I IFNs <sup>(37-</sup>  
391 <sup>39)</sup>, was found to be upregulated particularly in Micro-3 (2.8-fold change). While the  
392 TLRs were extensively upregulated in microglial cells, Micro-7 and Micro-11 had the  
393 highest expression of TLR2, Micro-1 had the highest expression of TLR4, and Micro-  
394 3 and Micro-7 had the highest expression of TLR7 during acute SIV infection (**Figure**  
395 **S4A**), indicating different microglial clusters might favor different TLR signaling  
396 pathways to produce proinflammatory cytokines. In summary, all of the upregulated  
397 pathways in acute SIV infection pointed to the pathways related to interferons and  
398 TLR-induced inflammatory cytokine production, highlighting the critical roles of them  
399 in microglia defense against acute SIV infection.

400 **The predominant CAM cluster phenotype in acute SIV infection was**  
401 **CD14<sup>hi</sup>CD16<sup>low</sup>**

402 In the characterization of the predicted phenotypes for those two macrophage  
403 clusters, we found that Macro-6 had lower expression of the inflammatory molecules  
404 which were highly expressed in Macro-8 (e.g., APOE, CST3, MSR1). Instead, it had  
405 higher expression of the cell adhesion molecules (e.g., PECAM1 and integrins)  
406 **(Figure 4A and Table S2)**. In addition, Macro-6 was found to have high expression of  
407 CD16 (FCGR3) but low expression of CD14, and Macro-8 had high expression of  
408 CD14 but low expression of CD16 **(Figure 4B)**. In human blood, CD14<sup>hi</sup>CD16<sup>low</sup> cells  
409 are described as inflammatory classical monocytes/ macrophages which are trafficked  
410 to sites of inflammation and/or infection, and CD14<sup>low</sup>CD16<sup>hi</sup> cells are the patrolling  
411 non-classical monocytes/macrophages, which adhere and crawl along the luminal  
412 surface of endothelial cells.<sup>(40)</sup> In this study, we found that acute SIV infection shifted  
413 the dominant CAM phenotype from CD14<sup>low</sup>CD16<sup>hi</sup> (Macro-6) to CD14<sup>hi</sup>CD16<sup>low</sup>  
414 (Macro-8). Although Macro-8 appears to represent the classical inflammatory  
415 phenotype, it also had higher expression of the markers for anti-inflammatory M2-like  
416 macrophages (e.g., MRC1/CD206, CD163). Regarding differentiation, it was reported  
417 that the CD14<sup>hi</sup>CD16<sup>low</sup> phenotype can be directly differentiated from precursor cells  
418 in bone marrow, and it is the obligatory precursor intermediate for CD14<sup>low</sup>CD16<sup>hi</sup>  
419 phenotype in the blood.<sup>(41)</sup> Intriguingly, through trajectory analyses we also found that  
420 the CD14<sup>low</sup>CD16<sup>hi</sup> CAMs (Macro-6) had a larger value of pseudotime compared to  
421 the CD14<sup>hi</sup>CD16<sup>low</sup> CAMs (Macro-8) **(Figure 4C)**, suggesting CD14<sup>hi</sup>CD16<sup>low</sup> cells  
422 might also be the precursor intermediate for CD14<sup>low</sup>CD16<sup>hi</sup> cells in CNS.

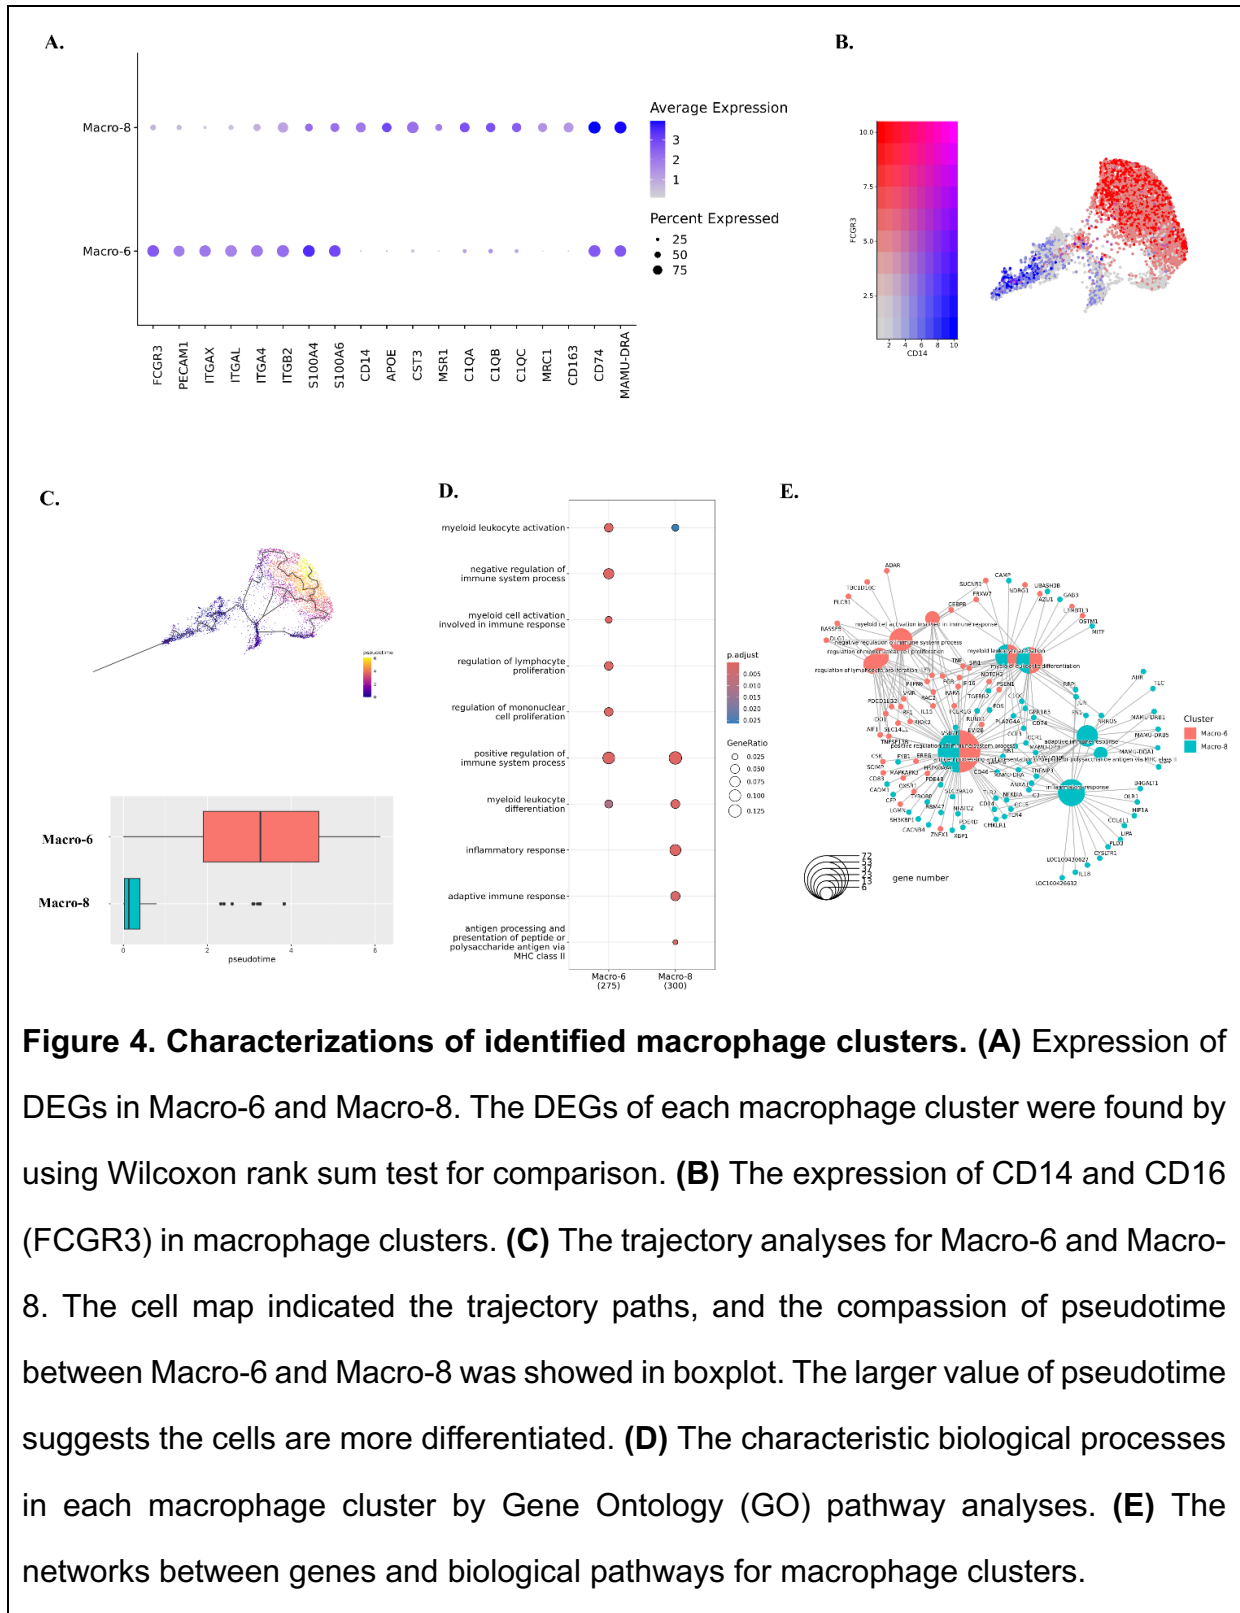

423

424 **Figure 4. Characterizations of identified macrophage clusters. (A)** Expression of

425 DEGs in Macro-6 and Macro-8. The DEGs of each macrophage cluster were found by

426 using Wilcoxon rank sum test for comparison. **(B)** The expression of CD14 and CD16

427 (FCGR3) in macrophage clusters. **(C)** The trajectory analyses for Macro-6 and Macro-8.

428 The cell map indicated the trajectory paths, and the comparison of pseudotime

429 between Macro-6 and Macro-8 was showed in boxplot. The larger value of pseudotime

430 suggests the cells are more differentiated. **(D)** The characteristic biological processes

431 in each macrophage cluster by Gene Ontology (GO) pathway analyses. **(E)** The

432 networks between genes and biological pathways for macrophage clusters.

433

434 The GO results indicated that cells in both the Macro-6 and Macro-8 clusters  
435 participated in myeloid leukocyte activation and differentiation, which suggested these  
436 two phenotypes might originate or differentiate from infiltrating monocytes.  
437 According to the opposite biological functions of CD14<sup>hi</sup>CD16<sup>low</sup> and CD14<sup>low</sup>CD16<sup>hi</sup>  
438 monocytes in the periphery, the Macro-6 cluster had both positive and negative  
439 regulations of the immune processes, however, the Macro-8 cluster lacked the  
440 negative regulation of the immune responses and thus had the potential to trigger  
441 inflammation (**Figure 4D**). Furthermore, those two CAM clusters might also have the  
442 potential for interactions with infiltrating lymphocytes and adaptive immune responses,  
443 functions that were not found in the microglia clusters. For example, Macro-6 was  
444 predicted to regulate lymphocyte proliferation by secreting IL-15, which is an important  
445 stimulator for T/NK cells' proliferation and activation. Macro-8 highly expressed MHC  
446 class II as well as other molecules, which can present the antigens for triggering  
447 adaptive immune responses (**Figure 4E**). In summary, we identified both  
448 CD14<sup>hi</sup>CD16<sup>low</sup> and CD14<sup>low</sup>CD16<sup>hi</sup> macrophage phenotypes in the brains of rhesus  
449 macaque, and the CD14<sup>hi</sup>CD16<sup>low</sup> cells (Macro-8 cluster) became the dominant  
450 phenotype in acute SIV infection, whereas CD14<sup>low</sup>CD16<sup>hi</sup> cells (Macro-6 cluster)  
451 predominated in the uninfected condition.

452 **CAMs might be more activated in triggering immune responses under acute SIV**  
453 **infection than microglia.**

454 Consistent with the genes that were upregulated in all microglial clusters, most  
455 molecules related to MHC class I and IFN production were also significantly  
456 upregulated in both macrophage clusters (**Figure 5A and 5B**). However, unlike  
457 microglial clusters, the IFI44L gene had extremely low expression in macrophage  
458 clusters. The changes of MHC class II molecules in macrophage clusters are different

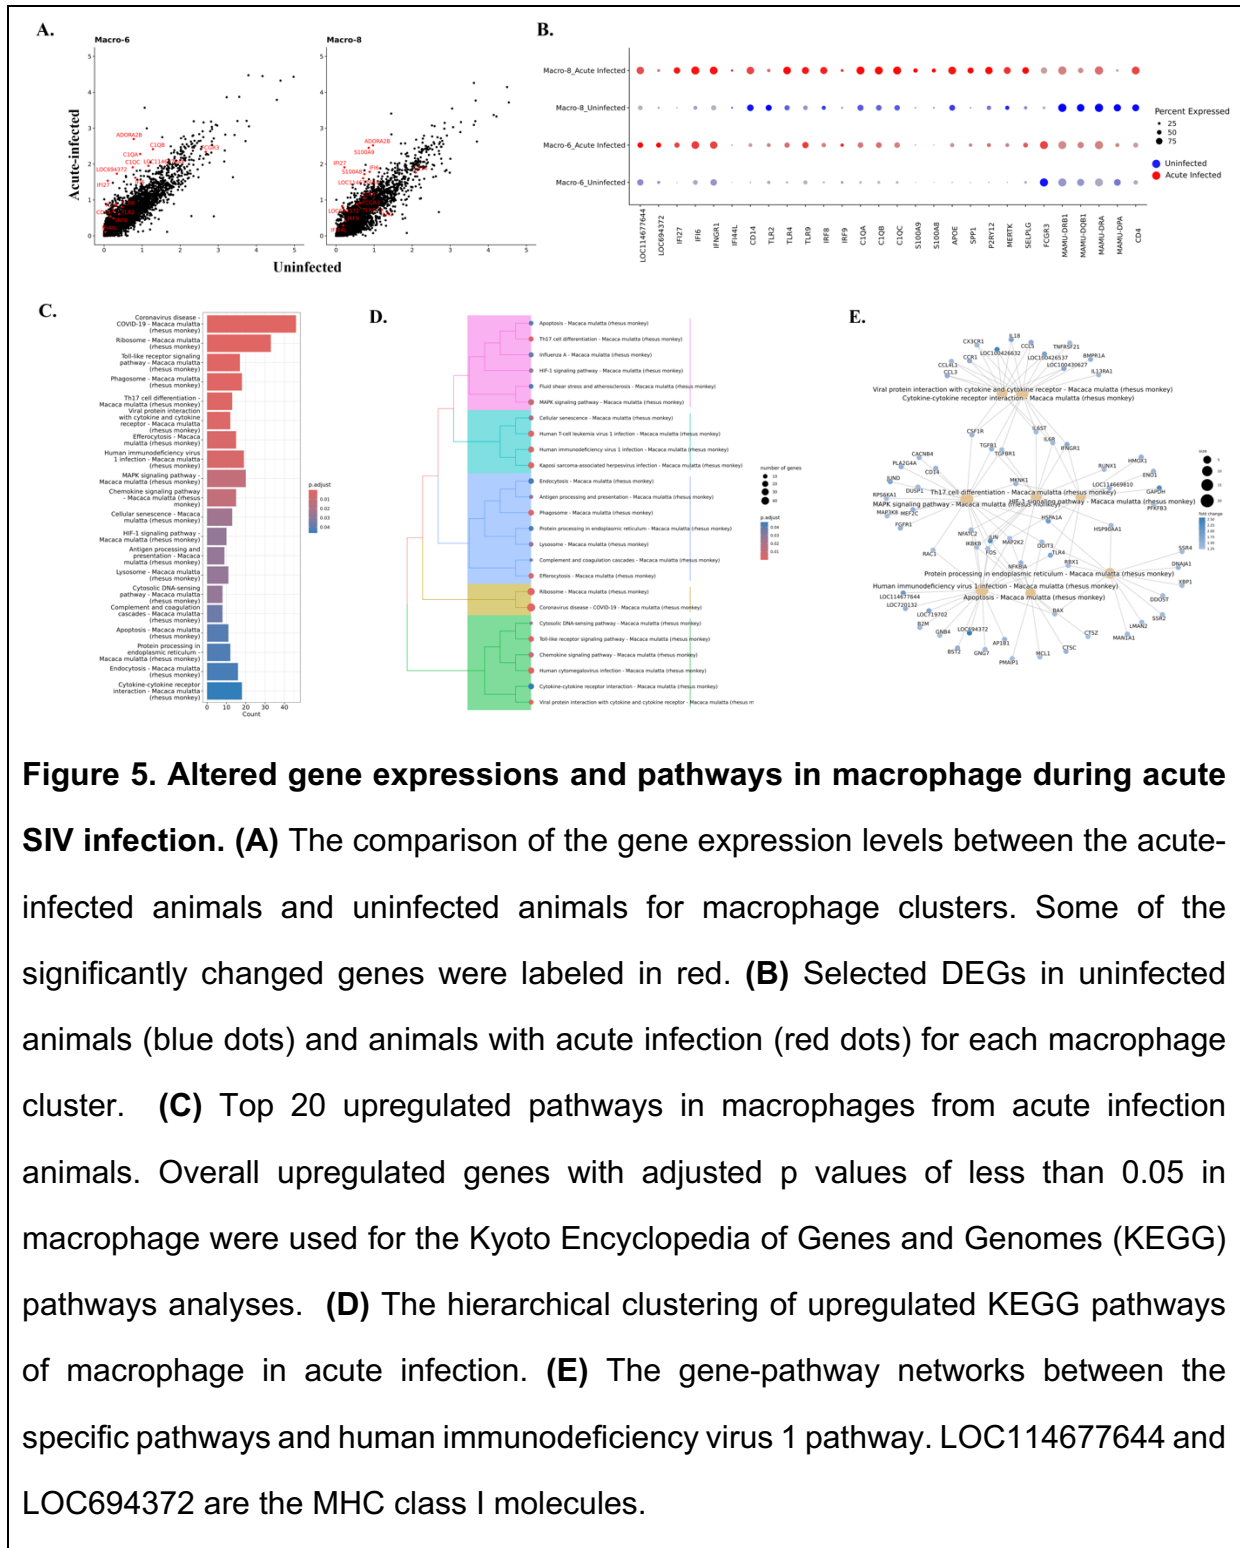

459

460

461

462

463

464

465

466

467

468

469

470

471

**Figure 5. Altered gene expressions and pathways in macrophage during acute SIV infection. (A)** The comparison of the gene expression levels between the acute-infected animals and uninfected animals for macrophage clusters. Some of the significantly changed genes were labeled in red. **(B)** Selected DEGs in uninfected animals (blue dots) and animals with acute infection (red dots) for each macrophage cluster. **(C)** Top 20 upregulated pathways in macrophages from acute infection animals. Overall upregulated genes with adjusted p values of less than 0.05 in macrophage were used for the Kyoto Encyclopedia of Genes and Genomes (KEGG) pathways analyses. **(D)** The hierarchical clustering of upregulated KEGG pathways of macrophage in acute infection. **(E)** The gene-pathway networks between the specific pathways and human immunodeficiency virus 1 pathway. LOC114677644 and LOC694372 are the MHC class I molecules.

472 between Macro-6 and Macro-8. The expression of MHC class II molecules in Macro-  
473 6 remained unchanged except for the downregulation of MAMU-DPA, however, the  
474 expression of those genes in Macro-8 was extensively downregulated in acute SIV  
475 infection, which is consistent with the changes of activated microglial clusters.  
476 Intriguingly, we also found that the CAMs significantly upregulated the core genes for  
477 homeostatic microglia during the acute SIV infection (**Figure 5B**). Given the myeloid  
478 lineage of microglia and CAMs, the similar behaviors in response to acute SIV infection  
479 might be expected (e.g., APOE and SPP1), but it was surprisingly that the homeostatic  
480 genes for microglia (e.g., P2RY12, GPR34) and other genes characterizing microglia  
481 (MERTK, SELPLG) that were downregulated or remained unchanged in microglial  
482 clusters during acute SIV infection were increased in CAMs, especially Macro-6. We  
483 found that that P2RY12 expression was upregulated 4-fold, GPR34 4.5-fold, SELPLG  
484 2.4-fold, and MERTK 3.7-fold in the Macro-6 cluster. Although Macro-6 highly  
485 upregulated those molecules, the expressions of microglial homeostatic core genes  
486 were still higher in Macro-8 during acute infection (**Figure S4B**). Furthermore, while  
487 Macro-6 was characterized as CD14<sup>low</sup>CD16<sup>hi</sup> macrophages, and Macro-8 was  
488 characterized as classic CD14<sup>hi</sup>CD16<sup>low</sup> macrophages, once they were in acute  
489 infection condition, the CD14<sup>hi</sup>CD16<sup>low</sup> cells upregulated CD16 (1.5-fold), whereas the  
490 CD14<sup>low</sup>CD16<sup>hi</sup> cells upregulated CD14 (3.3-fold). This again highlights the plasticity  
491 of myeloid cells.

492 The elevation of CD14 in Macro-6 was also accompanied by the increased  
493 expression of TLR4, which is the coreceptor for CD14 in inducing pro-inflammatory  
494 signaling. In addition, more genes related to the inflammatory pathways (e.g., TLR2,  
495 TLR9, IRF8, IRF9, C1QA, C1QB, C1QC) were found to be increased in both  
496 macrophage clusters (**Figure 5B**). The fold-change of most inflammatory molecules



497 was higher in Macro-6 (e.g., C1QA, C1QB, and C1QC had a 2-fold change in Macro-  
498 6 but only ~1.2-fold change in Macro-8) but the overall expression level was still higher  
499 in Macro-8 compared to Macro-6 (**Figure S4B**). Macro-8 also significantly upregulated  
500 more molecules related to innate defense, such as S100A8 (fold-change: 2.3) and  
501 S100A9 (fold-change: 2.9), which was not observed in Macro-6. In summary, these  
502 results suggest that the immunosuppressed phenotype of Macro-6 might differentiate  
503 toward inflammatory phenotype, and the pre-activated phenotype of Macro-8  
504 upregulated more inflammatory molecules and signaling pathways during the acute  
505 infection.

506 The KEGG gene enrichment analyses for macrophages showed more  
507 upregulated inflammatory pathways compared to microglia (**Figure S5 and Table S5**).  
508 Overall, the macrophages not only enhanced the pathways that were found to be  
509 upregulated in microglia, but also augmented other inflammation-related pathways, for  
510 example, the interaction between viral proteins and cytokine/chemokine receptors and  
511 Th17 cell differentiation (**Figure 5C and 5D**). In the characterization of the CAMs by  
512 their featured pathways, we found that these macrophages might have more  
513 interactions with the T cells than microglial cells. When we further examined the genes  
514 that were upregulated during acute SIV infection in the KEGG pathways, we found  
515 that they were enriched in the ability to induce Th17 differentiation during acute SIV  
516 infection. The genes that are mapped to this pathway included IL-6 and TGFB (**Figure**  
517 **5E**), which were reported as key cytokines secreted by macrophages to trigger  
518 differentiation of Th17 cells.<sup>(42, 43)</sup> Given the pleiotropic functions of those two  
519 cytokines, their increase might not be necessarily correlated with Th17 differentiation,  
520 but their increased expression in perivascular macrophages responding to acute SIV  
521 infection has been confirmed in rhesus macaque.<sup>(44)</sup> Even though more inflammatory

522 or immunological pathways were upregulated in macrophages compared to microglia,  
523 the key pathway that connects them with HIV-1 infection might also involve the NF- $\kappa$ B  
524 signaling. In the gene-pathway connections (**Figure 5E**), multiple molecules and  
525 kinases for NF- $\kappa$ B signaling (e.g., IKBKB, JUN, FOS, MAP2K2, NFKBIA, TLR4)  
526 connected the HIV-1 infection and other inflammatory or anti-viral pathways.

527 **The genes that were upregulated in Micro-3 and Macro-8 clusters in response to**  
528 **acute SIV infection are associated with multiple neurological diseases.**

529 The microglial and macrophage clusters that were widely activated, with increased  
530 expression of proinflammatory cytokines and chemokines in acute SIV infection, might  
531 induce toxicities not only for the virus but also for neurons and other cells in the CNS.  
532 Here, we found that one microglial cluster and one macrophage cluster may be  
533 strongly related to neurological disorders such as HAND. The upregulated genes  
534 analyzed with KEGG gene enrichment analyses for each cluster revealed that there  
535 was a category of pathways including those leading to multiple neurocognitive  
536 disorders in both the Micro-3 and Macro-8 clusters (**Figure 6A**). Prion disease,  
537 Parkinson disease, Alzheimer disease, Huntington disease, and amyotrophic lateral  
538 sclerosis were in the list of this category. In Micro-3, all of those five  
539 neurodegeneration-associated pathways have extremely low adjusted p-value  
540 ( $<0.002$ ); in Macro-8 the Huntington disease and amyotrophic lateral sclerosis had a  
541 slightly higher adjust p-value ( $\sim 0.006$ ). The mapped genes in those pathways were  
542 related to mitochondrial functions, and we found that the fold-change of the associated  
543 genes in Macro-8 was higher than the Micro-3 (**Figure 6B**).

544 To further confirm the specificity of neurodegenerative molecules in Micro-3 and  
545 Macro-8 during the acute SIV infection, we then compared the expression changes for



555 a number of these genes in all microglia and macrophages under uninfected  
556 conditions and infected conditions. Consistent with the above, we found that those  
557 genes were significantly upregulated in Micro-3 and Macro-8 in acute SIV infection  
558 **(Figure 7A and Figure 7C)**. However, the expression of these genes barely changed  
559 when we compared them in all microglial cells **(Figure 7B)**. Although genes that are  
560 related to the mitochondria functions seemed to be upregulated when all macrophages  
561 in infected and uninfected conditions were compared **(Figure 7D)**, the overall  
562 changing fold was not as prominent as in the Macro-8 cluster. All of these results  
563 suggested that the Micro-3 and Macro-8 clusters might be strongly associated with the  
564 induction of neurological disturbances when activated in acute SIV infection.

565 **Apoptotic resistance was not initiated during acute SIV infection in myeloid cells**  
566 **in the brain.**

567 HIV was reported to upregulate the expression anti-apoptotic molecules and  
568 downregulate pro-apoptotic molecules to enable the survival of infected host cells.<sup>(25,</sup>  
569 <sup>26, 45, 46)</sup> Those anti-apoptotic molecules (e.g., BCL2, BFL1, BCL-XL, MCL-1) and pro-  
570 apoptotic molecules (e.g., BAX, BIM, BAK1, BAD) are typically found in BCL-2 family.  
571 While microglia and macrophages are typically thought to be long-lived, the  
572 mechanism of survival following HIV infection has not been extensively studied. To  
573 examine if HIV infection of myeloid cells in the brain could lead to the establishment  
574 of the virus reservoir by blocking apoptosis, we first compared the expression of anti-  
575 apoptotic and pro-apoptotic molecules between macrophages and microglia in acute-  
576 infected animals and uninfected animals **(Figure 8A)**. However, we did not observe  
577 remarkable changes in the RNAs encoded by these molecules in macrophages and  
578 microglia during acute infection. We did observe the anti-apoptotic molecule BCL2  
579 was downregulated, and the pro-apoptotic molecule BAX was upregulated, suggesting

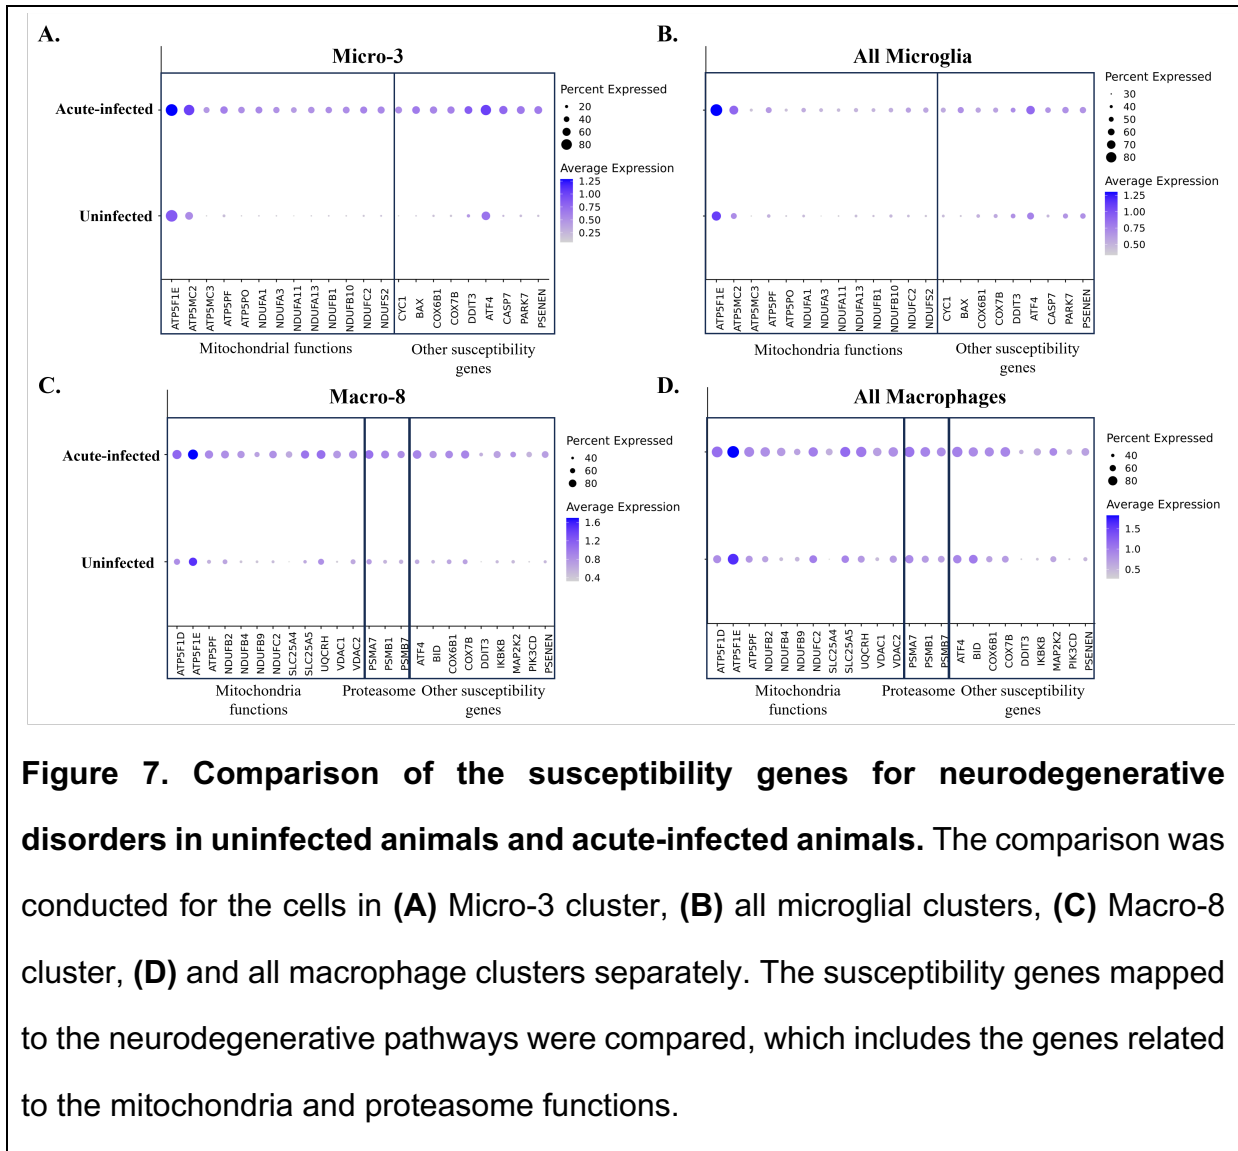

580

581

582

583

584

585

586

587

**Figure 7. Comparison of the susceptibility genes for neurodegenerative disorders in uninfected animals and acute-infected animals.** The comparison was conducted for the cells in **(A)** Micro-3 cluster, **(B)** all microglial clusters, **(C)** Macro-8 cluster, **(D)** and all macrophage clusters separately. The susceptibility genes mapped to the neurodegenerative pathways were compared, which includes the genes related to the mitochondria and proteasome functions.

588 that the macrophages and microglia are prone to undergo apoptosis *in vivo* upon SIV  
589 infection. Then we further investigated the change of these molecules in individual  
590 myeloid cell cluster (**Figure 8B**). The BCL2 gene was downregulated in most clusters,  
591 and the cluster which did not downregulate BCL2 (Macro-6) was found to maintain its  
592 expression without change. On the other hand, the pro-apoptotic gene, BAX was  
593 widely upregulated in most cell clusters. For other anti-apoptotic gene expressions,  
594 we found that MCL1 was upregulated, except in homeostatic Micro-0 and Micro-1,  
595 CFLIP (CFLAR) was upregulated in Micro-3 and Micro-11, and others remained  
596 unchanged or slightly downregulated in infection. The pro-apoptotic molecules were  
597 generally upregulated, for example, BAK1 was upregulated in Micro-3, Micro-7, and  
598 Micro-11, BID was upregulated in Micro-3 and Macro-8, and PMAIP1 was upregulated  
599 in Micro-11. However, a known pro-apoptotic molecule for microglia and macrophage,  
600 BIM (BCL2L11), was found to be downregulated in Macro-6 and Macro-8.  
601 Interestingly, we found that another anti-apoptotic molecule CD5L, which is not  
602 included in BCL-2 family, was highly upregulated in Micro-11.  
603

604

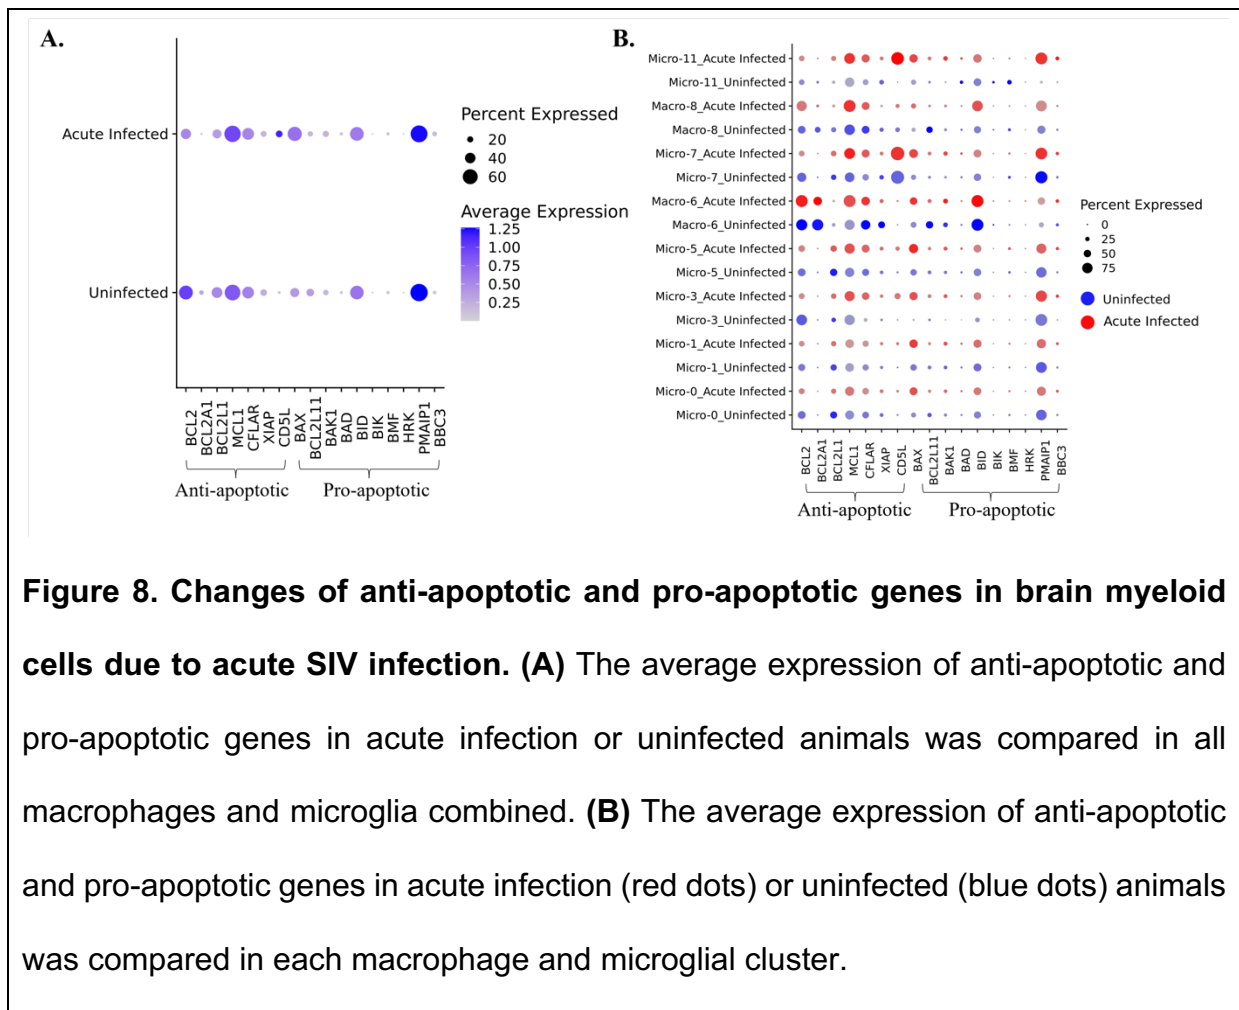

## 612 **DISCUSSION**

613           Microglia are the major innate immune cells in the brain and serve multiple  
614 functions. They are active in protecting the brain from invading pathogens, clearing  
615 damaged synapses as well as dying cells, and promoting neuron development. While  
616 not as extensively characterized as neurons, they are indeed heterogeneous, and with  
617 the advent of scRNA-seq our studies and those of others have identified a number of  
618 classes of microglia.<sup>(47-50)</sup> To maintain a steady state while gaining some immunogenic  
619 properties, microglia express several homeostatic genes. Downregulation and/or  
620 mutations of these homeostatic genes can lead to uncontrolled neuroinflammation,  
621 neurotoxicity and multiple neurocognitive diseases.<sup>(51-55)</sup> In this study, we found  
622 multiple populations of microglia which changed their proportions during acute SIV  
623 infection. During acute SIV infection overall activation was observed, with a lower  
624 expression of homeostatic genes and a decreased proportion of cells with a  
625 homeostatic phenotype. In addition, we found the major homeostatic microglial cluster,  
626 Micro-0, was enriched in the TGF $\beta$  signaling pathway, which was not observed for the  
627 other microglial clusters. Based on others' findings, the silencing of TGF $\beta$  signaling in  
628 microglia resulted in loss of microglial ramification and the upregulation of  
629 inflammatory markers without any external stimulus relative to wild-type microglia.<sup>(30,</sup>  
630 <sup>56)</sup> Considering the pleiotropic functions of TGF $\beta$  signaling in microglial cells,<sup>(57-59)</sup> the  
631 more active TGF $\beta$  pathway in Micro-0 suggested this homeostatic microglial cluster  
632 might be more active in stimulating microglial differentiation and regulating the  
633 activation of other microglial clusters.

634           Although the proportion of cells in Micro-0 remarkably decreased during acute  
635 SIV infection, this was still the dominant microglial population (consisting of 44.1% of  
636 microglial cells in acute infection, compared to 64.1% in uninfected animals) in the



637 brain, suggesting that microglial activation was still under some control during the  
638 acute infection stage. In addition, Micro-0 did not show prominent signs of activation  
639 during this stage, which could be attributed to their high activity in TGF $\beta$  signaling. The  
640 Micro-1 cluster, with high expression of microglial core genes but lack of TGF $\beta$   
641 signaling pathway enrichment, was much more inducible in terms of gene expression  
642 during acute SIV infection than the homeostatic Micro-0 cluster. More pathogenic and  
643 inflammatory pathways were upregulated for Micro-1 during acute SIV infection  
644 **(Figure S3)**, highlighting the importance of TGF $\beta$  signaling pathway in regulating  
645 microglial activation.

646 Micro-1, similar to Micro-0, also decreased its proportion in acute infection,  
647 comprising 27.1% of the myeloid cells versus 32% in the uninfected animals. These  
648 decreases were accompanied by prominent changes in the proportions of other  
649 microglial populations in acute infection, as Micro-3, -5, -7, and -11 all increased their  
650 representation. For CAMs the dominant cluster changed from Macro-6 (65% in  
651 uninfected animals) to Macro-8 (72.9% in acute SIV infection). All these were  
652 characterized by increased signs of cellular activation.

653 In uninfected brains, the activated microglial clusters constituted a low but  
654 noticeable presence (<5% proportion). Those activated microglia cells have been  
655 reported to exist in the healthy brain at different anatomic locations and are involved  
656 in diverse neurological events compared with homeostatic microglia.<sup>(60-62)</sup> From  
657 scRNA-seq experiments, it is difficult to determine the biological meaning of such low  
658 proportion cell clusters. Therefore, to better interpret the changes in gene expression  
659 during the acute SIV infection, we did the comparisons in multiple ways.

660 We found that MHC class I genes and genes related to interferon production  
661 were significantly upregulated in both microglial and macrophage clusters during acute

662 SIV infection. However, the expression levels were different between individual  
663 clusters, suggesting discrepancies of responses for each cluster. For virus infection,  
664 MHC class I molecules are key to the host defense for their ability to present virus  
665 proteins in the infected cells to the cytotoxic T/NK cells in MHC class I manner.<sup>(63)</sup> The  
666 significant upregulation of MHC class I molecules in all myeloid cell clusters also  
667 indicated that the reaction to initial SIV infection might not be limited to the low  
668 proportion of microglia and macrophages infected with SIV, and that the bystander  
669 cells also showed reactivity to the infection. This was further supported by the  
670 transcriptional changes in these bystander cells (**Table S3**).

671 The expression of type I interferons, especially IFN $\beta$ <sup>(64, 65)</sup> has been found to be  
672 widely upregulated in acute SIV infection. In response to the production of IFN $\beta$ , the  
673 downstream ISGs that are induced by type I IFNs to amplify the antiviral effects have  
674 been found to be upregulated in blood and lymph nodes during the acute SIV/HIV  
675 infection in rhesus macaque and human.<sup>(66, 67)</sup> Our recent and prior studies of  
676 microglial responses to acute and chronic SIV infection in the brain<sup>(50, 68)</sup> also  
677 highlighted that numerous ISGs were significantly upregulated in the myeloid cells of  
678 the brain and might contribute to the HIV/SIV associated brain damages. Therefore,  
679 the high expression of ISGs starting at an early stage of SIV infection can extend to  
680 chronic infection in the brain's myeloid cell populations.

681 We note that one of the important pathways for type I IFN production is TLR  
682 signaling, and we found that TLR2 and TLR4 were widely upregulated in microglial  
683 and CAM clusters. TLR7, which can specifically bind with ssRNA from SIV, was  
684 upregulated in Micro-3, Micro-5, and Micro-11, and TLR9 which can bind with the CpG  
685 motif in DNA was widely upregulated in CAM clusters. All of these TLRs were reported  
686 to have the ability to recognize and bind with HIV,<sup>(69-71)</sup> although TLR7 might be the

687 primary target.<sup>(37)</sup> The presence of TLR4, TLR7, and TLR9 in endosomal  
688 compartments endows them the ability to recognize viral nucleic acids in the cells, and  
689 indeed their signaling pathways are related to the production of IFNs.<sup>(72-74)</sup> TLR  
690 signaling can trigger the transcription of numerous inflammatory cytokines (e.g., TNF-  
691  $\alpha$ , IL-6, IL-1 $\beta$ , etc), which were also found upregulated in microglial or macrophage  
692 clusters under acute SIV infection. All of those cytokines can serve as initiator or the  
693 products for the pathways associated with NF- $\kappa$ B and AP-1 signaling, which also has  
694 been found to be modulated by HIV/SIV for their establishment and reactivation from  
695 latency.<sup>(75-79)</sup>

696 CNS-associated macrophages, found in the interface between the parenchyma  
697 and the circulation, represent an important myeloid cell population in the brain distinct  
698 from microglia. Previously, all CAMs were thought to be derived from the monocytes  
699 in the circulation, but recent findings showed that CAMs are highly heterogenous.  
700 Some phenotypes might originate from the yolk sac and can be self-replenishable like  
701 microglia, which are different from the CAMs differentiating from the circulating  
702 monocytes.<sup>(80, 81)</sup> From the transcriptional perspective, the yolk sac-derived CAMs also  
703 share more similarities with microglia, and they are hard to separate based on their  
704 transcriptomic profiles.<sup>(80)</sup> Given the distance between CAM clusters and the microglial  
705 clusters on the UMAP and the low expression of microglial core genes in CAM clusters,  
706 Macro-6 and Macro-8 were more likely to be derived from the circulating monocytes.  
707 Like the two main phenotypes in the periphery, Macro-6 had a CD14<sup>low</sup>CD16<sup>hi</sup>  
708 phenotype with immunosuppressive properties and Macro-8 had a CD14<sup>hi</sup>CD16<sup>low</sup>  
709 phenotype with proinflammatory properties. During acute SIV infection, Macro-6  
710 upregulated more inflammatory molecules which were already highly expressed in  
711 Macro-8, indicating the Macro-6 could be activated and polarized toward the

712 inflammatory CD14<sup>hi</sup>CD16<sup>low</sup> phenotype. This observation is consistent with a report  
713 about the transcriptomic convergency of peripheral CD14<sup>++</sup>CD16<sup>+</sup> and CD14<sup>+</sup>CD16<sup>++</sup>  
714 population under the SIV infection.<sup>(82)</sup>

715 Intriguingly, macrophages also increased the expression of microglial core  
716 genes during the acute SIV infection. In a different system, it was found that the  
717 monocyte-derived macrophages in the retina adopted microglia-like gene expression  
718 during the degeneration processes,<sup>(83)</sup> which was similar to what we found for the  
719 CAMs in acute SIV infection. However, the reasons why CAMs share more similarities  
720 with microglia in response to stress or neurodegenerative diseases are still unknown.  
721 Although the CAM clusters synchronized the changes for most immunoreactive  
722 molecules, other immunoreactive molecules might change differently. For example,  
723 most MHC class II molecules that were not changed or slightly upregulated in Macro-  
724 6 were downregulated in Macro-8. The repression of MHC class II molecules in  
725 professional antigen-presenting cells (APCs) was also observed during HIV infection  
726 in humans, and serves as one of the immunodeficiency mechanisms of CD4<sup>+</sup> T cells  
727 in AIDS.<sup>(84-87)</sup> Therefore, the unchanged MHC class II in Macro-6 suggested that this  
728 cluster might be less likely to be affected by SIV-induced immunodeficiency at least in  
729 acute infection. They may still maintain the ability to trigger the activation and  
730 differentiation of CD4<sup>+</sup> T cells for host defense against SIV virus.

731 The activation of microglia and CAMs in the brain is essential for protecting  
732 against viral infection, however, the pro-inflammatory cytokines and cytotoxic  
733 molecules secreted by them might also lead to the damages for neurons as well as  
734 other supportive apparatus in CNS. Therefore, overreactive microglia and especially  
735 monocyte-derived CAMs were thought to play a central role in HAND before the era  
736 of efficacious antiretroviral therapy.<sup>(24, 88)</sup> By enriching the upregulated genes in each

737 microglial or macrophage cluster into the various pathways, we found that Micro-3 and  
738 Macro-8 clusters were linked with numerous neurological diseases, including  
739 Alzheimer's, Huntington's, and Parkinson's diseases during acute SIV infection. These  
740 changes CAMs and microglia also have potential in the pathogenesis of HAND by  
741 various disease mechanisms associated with neurodegeneration.<sup>(24)</sup> When we further  
742 identified the upregulated genes that were linked with those neurological disorders,  
743 we found that, the genes related to mitochondrial respiration were significantly  
744 upregulated in both Micro-3 and Macro-8. *In vitro*, HIV infection of macrophages has  
745 been shown to alter their mitochondrial energetic profiles, with the specific changed  
746 dependent on the stage of infection.<sup>(89)</sup>

747         Given the unmet need for the validated biomarkers of HAND in clinical  
748 settings,<sup>(90)</sup> some studies have sought to identify various proinflammatory cytokines  
749 and molecules associated with protein misfolding as biomarkers for HAND,<sup>(91, 92)</sup> and  
750 other studies explored the specific myeloid cell phenotypes for serving as  
751 biomarkers.<sup>(88, 93)</sup> Both HIV itself and the antiretroviral drugs used to treat HIV can  
752 affect mitochondria, and mitochondrial pathways are key suspects in the resulting  
753 neuropathogenesis of HIV and HAND.<sup>(94)</sup>

754         Although only Micro-3 and Macro-8 showed enrichment in multiple neurological  
755 disorder pathways, all the myeloid cell clusters were associated with the cellular  
756 senescence pathway, which might be another potential factor triggering or dampening  
757 the neurological disturbances.<sup>(95, 96)</sup> The potential effect of cell aging caused by acute  
758 SIV infection might not only happen in microglia or macrophages but extend to  
759 neurons as well as other brain cells. Indeed, while very few myeloid cells were directly  
760 infected, the bystander effects of infection were widely manifested. Furthermore, the  
761 inflammatory microglia and CAMs resulting from virus infection are also likely to trigger

762 or speed up cerebral aging.<sup>(97)</sup> Indeed epigenetic studies have found that HIV infection  
763 leads to an advancement of predicted biological age in blood cells as well as in the  
764 brain, and is associated with reduction in brain gray matter and cortical thickness.<sup>(98-  
765 101)</sup>

766 Both HAND and the establishment of HIV/SIV reservoir in CNS can occur  
767 irrespective of antiretroviral therapy.<sup>(102, 103)</sup> Macrophages and microglia cells are  
768 believed to serve as major HIV reservoir in the CNS given that they are prime targets  
769 for the virus and their known longevity.<sup>(14)</sup> Many pathways could be altered by HIV  
770 infection allowing for the long-term survival of the infected macrophages and microglia,  
771 and the anti-apoptotic or pro-apoptotic molecules in BCL-2 families were found to  
772 regulate the survival of macrophages and/or microglia in HIV infection.<sup>(25, 26, 104, 105)</sup>  
773 However, we did not observe a wide and significant upregulation of anti-apoptotic  
774 molecules or downregulation of pro-apoptotic molecules in myeloid cell populations  
775 identified in this study. The cluster that upregulated anti-apoptotic genes also  
776 upregulated pro-apoptotic genes, so it is difficult to identify a specific cluster that might  
777 facilitate the establishment of a SIV, and by analogy HIV, reservoir. From the average  
778 expression of the anti-apoptotic and pro-apoptotic molecules in BCL-2 families, the  
779 overall trend for the myeloid cells of the brain under acute SIV appears to be the  
780 enhancement of pro-apoptosis and suppression of anti-apoptosis, and the means in  
781 which reservoir cells survive long-term in unknown.

782 Still there might be other molecules in myeloid cells that can also regulate the  
783 apoptotic pathways. For example, we found upregulation of CD5L, which is also known  
784 as apoptosis inhibitor of macrophage (AIM). CD5L can support the survival of  
785 macrophages when the cells are challenged with infections or other dangers.<sup>(106)</sup>  
786 Although anti-apoptosis<sup>(107)</sup> is the most well-recognized function for this molecule, little

787 is known about the intracellular mechanisms underlying CD5L regulation of apoptosis.  
788 Whether this molecule could be modulated during the SIV/HIV for modulating the virus  
789 reservoir in macrophages or microglia needs further investigations.

790         Limitations to our study include the number of animals examined, study of a  
791 single time point during the acute infection period, the lower sensitivity of scRNA-seq,  
792 the lack of spatial assessment within the brain of where these populations of cells are  
793 present, and potential differences between SIV infection of rhesus monkeys and HIV  
794 infection of people. However, studies of the brain in people are largely limited to post-  
795 mortem studies and lack control over conditions. Yet many considerations limit the  
796 number of nonhuman primates used for terminal experimental studies. The deposition  
797 of sequence data and metadata in publicly accessible databases from our studies and  
798 others' enables the building of larger analyses with more subjects. These data can be  
799 useful in meta-analyses across models and disease states.<sup>(108)</sup> The ability to purify  
800 microglia and macrophages from the brains and the ability to examine thousands of  
801 cells from each animal is an advantage enabling the identification and study of less  
802 prevalent populations. The continued development of spatial transcriptomics,  
803 sequencing methods and other technological and analytic advances will also help  
804 alleviate these limitations.

805         In conclusion, by performing scRNA-seq to assess the brain myeloid cells in  
806 rhesus macaques, we identified six microglial clusters and two macrophage clusters.  
807 In response to the acute SIV infection of a small proportion of cells, all myeloid clusters  
808 upregulated the genes related to MHC class I molecules and IFN signaling, which also  
809 served as the key connections for other cellular responses to the HIV/SIV infection.  
810 The activated microglial and macrophage clusters with more upregulated inflammatory  
811 cytokines increased their proportions and the homeostatic or immunosuppressive

812 myeloid clusters decreased their proportions during acute SIV infection. Among the  
813 activated clusters, both a microglial cluster and a macrophage cluster were identified  
814 that exhibited dysregulation of genes associated with pathways linked to  
815 neurodegenerative disorders. Changes in all of the microglial clusters may contribute  
816 to worsening neurological health due to their enhanced ability to produce inflammatory  
817 molecules and involvement in cellular senescence.

818

819

## 820 **MATERIALS AND METHODS**

### 821 **Animals**

822 The six male adult rhesus macaques used in this study were purchased from  
823 PrimGen (Hines, IL) and New Iberia (LA), and tested negative for the indicated viral  
824 pathogens: SIV, SRV, STLV1, Herpes B-virus, and measles; and bacterial pathogens:  
825 salmonella, shigella, campylobacter, yersinia, and vibrio. Macaques were housed in  
826 compliance with the Animal Welfare Act and the Guide for the Care and Use of  
827 Laboratory Animals in the NHP facilities of the Department of Comparative Medicine,  
828 University of Nebraska Medical Center (UNMC). The primate facility at UNMC has  
829 been accredited by the American Association for Accreditation of Laboratory Animal  
830 Care international. The UNMC Institutional Animal Care and Use Committee (IACUC)  
831 reviewed and approved this study under protocols 19-145-12-FC and 16-073-07-FC.  
832 Animals were maintained in a temperature-controlled ( $23 \pm 2^\circ \text{C}$ ) indoor climate with  
833 a 12-h light/dark cycle. They were fed Teklad Global 25% protein primate diet (Envigo,  
834 Madison, WI) supplemented with fresh fruit, vegetables, and water *ad libitum*. The  
835 monkeys were observed twice daily for health status by the animal care and veterinary  
836 personnel. Three of the six animals were intravenously inoculated with a stock of



837 SIV<sub>mac</sub>251 to establish acute SIV infection (93T, 94T, and 95T). The other three  
838 macaques were uninfected (92T, 104T, and 111T) and used as control. Virus stocks  
839 were provided by the Virus Characterization, Isolation and Production Core at Tulane  
840 National Primate Research Center.

#### 841 **Viral loads**

842 To determine the viral load in plasma, the blood of infected animals (93T, 94T  
843 and 95T) was collected at 7-day and 12-day post-inoculation of SIV. The EDTA-  
844 anticoagulated plasma was separated from blood by centrifugation. Specimens of  
845 brain and lymphoid organs were taken for determination of viral load in tissues. Plasma  
846 SIV RNA levels were determined using a gag-targeted quantitative real time/digital  
847 RT-PCR format assay, essentially as previously described, with six replicate reactions  
848 analyzed per extracted sample for assay threshold of 15 SIV RNA copies/ml.<sup>(109)</sup>  
849 Quantitative assessment of SIV DNA and RNA in tissues was performed using gag-  
850 targeted nested quantitative hybrid real-time/digital RT-PCR and PCR assays, as  
851 previously described.<sup>(109, 110)</sup> SIV RNA or DNA copy numbers were normalized based  
852 on quantitation of a single copy rhesus genomic DNA sequence from the CCR5 locus  
853 from the same specimen to allow normalization of SIV RNA or DNA copy numbers per  
854 10<sup>6</sup> diploid genome cell equivalents, as described.<sup>(111)</sup> Ten replicate reactions were  
855 performed with aliquots of extracted DNA or RNA from each sample, with two  
856 additional spiked internal control reactions performed with each sample to assess  
857 potential reaction inhibition. The viral load in plasma, lymphatic tissues and brain are  
858 shown in **Figure S1** and **Table S1**.

#### 859 **Isolation of myeloid cells in the brain**

860 Twelve days after viral inoculation, necropsy was performed on deeply  
861 anesthetized (ketamine plus xylazine) animals, following intracardial perfusion with

862 sterile PBS containing 1 U/ml heparin. Brains were harvested and approximately half  
863 of the brain was then taken for microglia/macrophage isolation.  
864 Microglia/macrophage-enriched cellular isolation was performed using our previously  
865 described procedure.<sup>(112)</sup> Briefly, the brain was minced and homogenized in cold  
866 Hank's Balanced Salt Solution (HBSS, Invitrogen, Carlsbad, CA). After being  
867 centrifuged, the brain tissue was then digested at 37° C in HBSS containing 28 U/ml  
868 DNase I and 8 U/ml papain for 30 minutes. After digestion, the enzymes were  
869 inactivated by addition of 2.5% FBS, and the cells centrifuged and resuspended in  
870 cold HBSS. The cell suspension was mixed with 90% Percoll (GE HealthCare,  
871 Pittsburg, PA) and centrifuged at 4° C for 15 minutes at 550 x g. The  
872 microglia/macrophage pellet at the bottom was resuspended in HBSS and passed  
873 through a 40 µm strainer to remove cell clumps and/or aggregates. Cells were again  
874 pelleted by centrifugation and resuspended in RBC lysis buffer for 3 minutes to  
875 eliminate any contaminating red blood cells. A final wash was performed before the  
876 resulting cells were quantified on both a hemocytometer and Coulter Counter Z1. The  
877 isolated cells were then sorted for scRNA-seq. The cells in samples 92T, 93T, 94T,  
878 95T were sorted and sequenced right after the isolation, but the cells in samples 104T  
879 and 111T were cryopreserved before the cell sorting and scRNA-seq. The methods  
880 for cryopreservation followed our previous study, which was found to maintain the vast  
881 majority of the transcriptomic features of fresh isolated microglia/macrophages.<sup>(112)</sup>  
882 Specifically, after isolation as above, the cells were centrifuged at 4° C at 550 x g for  
883 5 minutes and the supernatant was removed. The pellet was dissociated by tapping  
884 and then resuspended by the dropwise addition of a solution of 4° C 10% DMSO in  
885 FBS at a concentration of 10<sup>6</sup> cells per milliliter. Cells were transferred to

886 cryopreservation tubes and slowly controlled freezing at  $-80^{\circ}$  C. After 24 hours,  
887 cryotubes were transferred to liquid nitrogen for long-term storage.

### 888 **Single cell preparation and RNA sequencing**

889 For fresh brain isolates, cells were washed in PBS, and first stained with UV-  
890 blue live/dead. Cells we then washed, resuspended in MACS buffer with 0.1% BSA,  
891 and counted. The cells were then stained with non-human primate CD11b microbeads  
892 and CD45 microbeads (Miltenyi, San Diego, CA, USA). Four hundred million cells  
893 were reconstituted in 320  $\mu$ L of MACS buffer and reacted with 180  $\mu$ L of CD11b and  
894 40  $\mu$ L of CD45 microbeads at  $4^{\circ}$  C for 15 minutes. After incubation, cells were washed,  
895 resuspended in 1 ml of MACS buffer, and loaded on MACS Separator LS columns.  
896 The double enriched fractions were collected and counted, and then stained with  
897 antibody cocktails including BV711-labeled anti-CD20 antibody, BV421-labeled anti-  
898 CD3 antibody, BV605-labeled anti-CD11b antibody and PE-labeled anti-CD45  
899 antibody (Biolegend, San Diego, CA) for 45 minutes at  $4^{\circ}$  C. Cells were washed with  
900 e-bioscience flow cytometry staining buffer and sorted on Aria2 flow cytometer (BD  
901 Biosciences, San Jose, CA, USA). The selection of cells was based on the size,  
902 singlet, live and the expression of CD20, CD3, CD45, and CD11b. The CD20 positive  
903 cells were all excluded, and the CD20 negative cells that were positive for either CD45  
904 or CD11b or both CD45 and CD11b were collected for scRNA-seq library preparations.

905 Samples of cryopreserved cell isolates, stored in liquid nitrogen described  
906 above, were rapidly thawed in a  $37^{\circ}$  C water-bath. The cell recovery procedures were  
907 well described in our previous publications.<sup>(112)</sup> After the recovery, cells were washed  
908 and counted by Coulter Counter Z1. Once cell concentration was known, cells were  
909 transferred to ice-cold PBS, and followed the aforementioned procedures for CD45  
910 and CD11b enrichment and FACS sorting.

911 Post-sorting, isolates were concentrated to approximately 1000 cells per  $\mu\text{L}$ ,  
912 and assessed by trypan blue for viability and concentration. Based on 10 $\times$  Genomics  
913 parameters targeting 8000 cells, the ideal volume of cells was loaded onto the 10 $\times$   
914 Genomics (Pleasanton, CA, USA) Chromium GEM Chip and placed into the  
915 Chromium Controller for cell capturing and library preparation. This occurs through  
916 microfluidics and combining with Single Cell 3' Gel Beads containing unique barcoded  
917 primers with a unique molecular identifier (UMI), followed by lysis of cells and  
918 barcoded reverse transcription of RNA, amplification of barcoded cDNA,  
919 fragmentation of cDNA to 200 bp, 5' adapter attachment, and sample indexing as the  
920 manufacturer instructed with version 3 reagent kits. The prepared libraries were then  
921 sequenced using Illumina (San Diego, CA, USA) Nextseq550 and Novaseq6000  
922 sequencers. The sequences have been deposited in NCBI GEO (accession number  
923 GSE253835).

## 924 **Bioinformatics**

925 Sequenced samples were processed using the 10 $\times$  Genomics Cell Ranger  
926 pipelines (7.1.0). Specifically, the scRNA data was demultiplexed and aligned to the  
927 customized Mmul10 rhesus macaque reference genome (NCBI RefSeq assembly)  
928 which was combined with a chromosome representing the SIV genome. For this,  
929 overlapping PCR products derived from reverse-transcribed RNA isolated from  
930 PBMCs of infected animals 93T and 94T were sequenced using Sanger chemistry and  
931 sequences combined to yield a consensus SIV genome. This sequence was deposited  
932 in NCBI GenBank, accession number PP236443. After filtering as well as counting the  
933 UMI and cell barcode by the Cell Ranger count pipeline, the sequenced samples from  
934 the same animals were aggregated together to generate a single file containing feature  
935 barcode matrices for the downstream analyses. The counting summary statistics

936 generated by 10x Genomics for each sample are shown in **Table S6**. The downstream  
937 analyses were then implemented with R (version: 4.3).

### 938 **Cell clustering and differentially expressed genes (DEGs)**

939 To cluster the cell and find DEGs for each cell cluster, the feature barcode  
940 matrices were analyzed with Seurat R package<sup>(113)</sup> (version: 4.3.0). We removed  
941 sparsely expressed genes and low-quality cells and kept genes which had expression  
942 in at least 10 cells and the cells with UMI count from 400 to 20,000, gene count from  
943 400 to 10,000, and mitochondrial percentage less than 15%. The final cell counts are  
944 shown in **Table S6**. Then the scRNA-seq datasets from six animals were merged to  
945 generate a single Seurat Object for further analyses. The normalization, scaling and  
946 finding variable genes were performed by SCTransform v2 (SCT).<sup>(114)</sup> After  
947 normalization, we performed principal component analyses (PCAs) with a default  
948 setting of 50 principal components (PCs) for reducing dimensionality. To minimize the  
949 batch effect and integrate the datasets, we implemented harmony<sup>(115)</sup> (version: 1.0)  
950 before clustering. The integrated dataset was then subjected to graph-based  
951 clustering which used the first 30 PCs and 0.2 as resolution. We selected the top 30  
952 PCs which explain approximately 80% of the total variation. The Uniform Manifold  
953 Approximation and Projection (UMAP) was used as a non-linear dimensional reduction  
954 method to further visualize the cell clusters. The settings for running UMAP mostly  
955 followed the default except for defining the dimensionalities using the first 30 batch  
956 effect corrected PCs.

957 We then characterized each cluster in two ways. First, we examined the  
958 expression of general cell markers for microglia (P2RY12, GPR34, and CX3CR1),  
959 CNS-associated macrophages (MHC class II), T/NK cells (CD3D, GZMB, and NKG7),  
960 B cells (EBF1 and MS4A1), and endothelial cells (RGS5, CLDN5, and ATP1A2) in

961 each cluster. Next, we found the DEGs for each cell cluster by performing the Wilcoxon  
962 rank sum test embedded in FindAllMarkers function of Seurat to the data that was  
963 normalized by SCT. The positive markers with 0.25-fold change (log-scale) on average  
964 that were detected in a minimum of 25% of cells in either of two populations were  
965 calculated as biomarkers for each cluster (**Table S2**). The DEGs that were found for  
966 the same macrophage/microglia cluster but under different infection conditions were  
967 also identified by using the above test method and criteria (**Table S4**). When we used  
968 the same way to find DEGs between infected cells and uninfected cells (Figure S2 and  
969 Table S3), to avoid losing the signal for SIV, we performed FindAllMarkers function on  
970 log-normalized data, which was obtained by applying LogNormalize function in Seurat  
971 with scale factor as 10000. The average gene expression for the  
972 macrophages/microglia in the same cluster was calculated for the uninfected cells and  
973 acute-infected cells separately, and then the values were added 1 and converted to  
974  $\log_{10}$  value for plotting. Given our goal in this study to analyze the myeloid cells in the  
975 brain, we then further subsetted the microglial and macrophage clusters and reran the  
976 FindAllMarkers function with the aforementioned settings within them separately. The  
977 DEGs that were found in subclusters of microglia or macrophages were further used  
978 in Gene Ontology (GO) analyses for further characterization.

979 ***Gene Ontology (GO) and Kyoto Encyclopedia of Genes and Genomes (KEGG)***  
980 ***Over-representation analyses (ORA)***

981 Over-representation analysis (ORA) is a widely used approach to determine  
982 whether known biological functions or processes are enriched in an experimentally  
983 derived gene list (e.g., DEGs), and the p-value in this analysis is calculated by  
984 hypergeometric distribution.<sup>(116)</sup> The GO-ORA and KEGG-ORA were all implemented  
985 with the clusterProfiler R package<sup>(117)</sup> (version: 4.0.2). The GO analysis uses Entrez

986 Gene identifiers instead of the common gene symbol. Therefore, we converted the  
987 common gene symbol to their Entrez Gene identifiers by genome wide annotation  
988 package for rhesus macaque (version: 3.18). This package mapped the gene symbol  
989 to Entrez Gene identifiers based on NCBI databases (updated on Sep-11, 2023). The  
990 featured pathways of each microglial or macrophage cluster were then identified using  
991 GO-ORA based on the DEGs, and the biological process (BP) was chosen as  
992 subontology for analysis. The KEGG-ORA used the DEGs that were found between  
993 different conditions as input to find the upregulated pathways for microglial or  
994 macrophage clusters in response to acute SIV infection. The gene annotation of  
995 rhesus macaque for KEGG analyses was found in KEGG database (Mmul10, RefSeq).  
996 For both GO-ORA and KEGG-ORA, the cutoff for p-value was set to <0.05. The results  
997 were visualized by dot plots, bar plots, tree plots, and gene-concept network, which  
998 were plotted using enrichplot package (version 1.22.0). All GO-ORA and KEGG-ORA  
999 pathways detected with p-value less than 0.05 were summarized in **Table S5**. In the  
1000 table, the analysis results provided geneRatio and BgRatio, which are the ratio of input  
1001 genes annotated in a term and the ratio of all genes that are annotated in this term  
1002 respectively.

### 1003 ***Trajectory analysis***

1004 The monocle3 R package<sup>(52, 118, 119)</sup> (version: 1.2.7) was used to estimate  
1005 lineage differentiation within the macrophage clusters. We extracted the macrophage  
1006 clusters from the merged Seurat Object and further constructed single-cell trajectories.  
1007 The trajectory graph was inferred and fitted to the cell clusters generated by Seurat.  
1008 The Macro-8 cluster was defined as the root node based on the prior knowledge<sup>(41)</sup> for  
1009 ordering all macrophages in their pseudotime. For visualization, the UMAP  
1010 embeddings from Seurat Object was used, the nodes and branches were delineated

1011 based on the trajectory analysis, and the cells were colored by their pseudotime. To  
1012 better compare the pseudotime of cells in Macro-6 and Macro-8, they were further  
1013 illustrated in box plot using ggplot2 (version: 3.4.4)

#### 1014 **Statistics**

1015 Alpha less than 0.05 was considered as a significant difference in all  
1016 comparisons. The DEGs were found using non-parametric Wilcox rank sum test, and  
1017 p-values were adjusted based on Bonferroni correction. In ORA analyses, the  
1018 enrichment p-value is calculated using hypergeometric distribution, and p-value was  
1019 adjusted in GO-ORA analysis to compare multiple microglial clusters.

1020

1021

#### 1022 **ACKNOWLEDGEMENTS**

1023 This work was supported by National Institutes of Health (NIH) grants U01DA053624,  
1024 R21MH128057, and P30MH062261. We thank Drs. Shilpa Buch and Siddappa  
1025 Byrareddy, Mr. Moses Apostol, Ms. Brenda Morsey (deceased), as well as all  
1026 members of our non-human primate/SIV collaborative team at UNMC. We also want  
1027 to acknowledge UMNC Genomics Core Facility and Flow Cytometry Research Facility  
1028 for the excellent technical support of scRNA-seq and FACS used in this study, the  
1029 University of Nebraska Lincoln (UNL) Computing Center for high-performance  
1030 supercomputer access, the Quantitative Molecular Diagnostics Core of the AIDS, the  
1031 Cancer Virus Program of the Frederick National Laboratory for expert assistance with  
1032 viral load measurements, and the Virus Characterization, Isolation and Production  
1033 Core at the Tulane National Primate Research Center for the SIV<sub>mac251</sub> stock. The  
1034 UNMC Genomics Core Facility receives partial support from the National Institute for  
1035 General Medical Science (NIGMS) INBRE grant P20GM103427, as well as the



1036 National Cancer Institute (NCI) Fred and Pamela Buffett Cancer Center support grant  
1037 P30CA036727. The UNMC Flow Cytometry Research Facility is supported by state  
1038 funds from the Nebraska Research Initiative and the NCI Fred and Pamela Buffett  
1039 Cancer Center Support Grant. The UNL Holland Computing Center receives support  
1040 from the UNL Office of Research and Economic Development and the Nebraska  
1041 Research Initiative. The Quantitative Molecular Diagnostics Core of the AIDS and  
1042 Cancer Virus Program of the Frederick National Laboratory is supported in part in part  
1043 with federal funds from the NCI, NIH, under Contract  
1044 75N91019D00024/HHSN261201500003I. The Virus Characterization, Isolation and  
1045 Production Core at Tulane National Primate Research Center is supported by NIH  
1046 grant P51OD011104 Major instrumentation at UNMC has been provided by the  
1047 UNMC Office of the Vice Chancellor for Research, The University of Nebraska  
1048 Foundation, the Nebraska Banker's Fund, and by the NIH Shared Instrument Program.  
1049 This publications' contents are the sole responsibility of the authors and do not  
1050 necessarily represent the official views or policies of the NIH or Department of Health  
1051 and Human Services, nor does mention of trade names, commercial products, or  
1052 organizations imply endorsement by the U.S. Government.

1053

1054

## 1055 **REFERENCES**

- 1056 1. Threats M, Brawner BM, Montgomery TM, Abrams J, Jemmott LS, Crouch PC,  
1057 et al. A Review of Recent HIV Prevention Interventions and Future Considerations for  
1058 Nursing Science. *J Assoc Nurses AIDS Care*. 2021;32(3):373-91.
- 1059 2. Burudi EME, Fox HS. Simian immunodeficiency virus model of HIV induced  
1060 central nervous system dysfunction. *Advances in Virus Research*. 56: Academic Press;  
1061 2001. p. 435-68.
- 1062 3. Fox HS, Gold LH, Henriksen SJ, Bloom FE. *Simian Immunodeficiency Virus: A*

- 1063 Model for NeuroAIDS. *Neurobiology of Disease*. 1997;4(3):265-74.
- 1064 4. Zink MC, Spelman JP, Robinson RB, Clements JE. SIV infection of macaques-  
1065 -modeling the progression to AIDS dementia. *J Neurovirol*. 1998;4(3):249-59.
- 1066 5. Avalos CR, Abreu CM, Queen SE, Li M, Price S, Shirk EN, et al. Brain  
1067 Macrophages in Simian Immunodeficiency Virus-Infected, Antiretroviral-Suppressed  
1068 Macaques: a Functional Latent Reservoir. *mBio*. 2017;8(4).
- 1069 6. Pantaleo G, Menzo S, Vaccarezza M, Graziosi C, Cohen OJ, Demarest JF, et  
1070 al. Studies in subjects with long-term nonprogressive human immunodeficiency virus  
1071 infection. *N Engl J Med*. 1995;332(4):209-16.
- 1072 7. Cohen MS, Shaw GM, McMichael AJ, Haynes BF. Acute HIV-1 Infection. *N Engl*  
1073 *J Med*. 2011;364(20):1943-54.
- 1074 8. Hladik F, Sakchalathorn P, Ballweber L, Lentz G, Fialkow M, Eschenbach D, et  
1075 al. Initial events in establishing vaginal entry and infection by human immunodeficiency  
1076 virus type-1. *Immunity*. 2007;26(2):257-70.
- 1077 9. Veazey RS, DeMaria M, Chalifoux LV, Shvetz DE, Pauley DR, Knight HL, et al.  
1078 Gastrointestinal Tract as a Major Site of CD4+ T Cell Depletion and Viral Replication  
1079 in SIV Infection. *Science*. 1998;280(5362):427-31.
- 1080 10. Mattapallil JJ, Douek DC, Hill B, Nishimura Y, Martin M, Roederer M. Massive  
1081 infection and loss of memory CD4+ T cells in multiple tissues during acute SIV infection.  
1082 *Nature*. 2005;434(7037):1093-7.
- 1083 11. Witwer KW, Gama L, Li M, Bartizal CM, Queen SE, Varrone JJ, et al.  
1084 Coordinated regulation of SIV replication and immune responses in the CNS. *PLoS*  
1085 *One*. 2009;4(12):e8129.
- 1086 12. Valcour V, Chalermchai T, Sailasuta N, Marovich M, Lerdlum S, Suttichom D, et  
1087 al. Central nervous system viral invasion and inflammation during acute HIV infection.  
1088 *J Infect Dis*. 2012;206(2):275-82.
- 1089 13. Clements JE, Babas T, Mankowski JL, Suryanarayana K, Piatak M, Jr.,  
1090 Tarwater PM, et al. The central nervous system as a reservoir for simian  
1091 immunodeficiency virus (SIV): steady-state levels of SIV DNA in brain from acute  
1092 through asymptomatic infection. *J Infect Dis*. 2002;186(7):905-13.
- 1093 14. Wallet C, De Rovere M, Van Assche J, Daouad F, De Wit S, Gautier V, et al.  
1094 Microglial Cells: The Main HIV-1 Reservoir in the Brain. *Front Cell Infect Microbiol*.  
1095 2019;9:362.
- 1096 15. Gannon P, Khan MZ, Kolson DL. Current understanding of HIV-associated  
1097 neurocognitive disorders pathogenesis. *Curr Opin Neurol*. 2011;24(3):275-83.

- 1098 16. Sacktor N, McDermott MP, Marder K, Schifitto G, Selnes OA, McArthur JC, et  
1099 al. HIV-associated cognitive impairment before and after the advent of combination  
1100 therapy. *J Neurovirol.* 2002;8(2):136-42.
- 1101 17. Kraft-Terry SD, Stothert AR, Buch S, Gendelman HE. HIV-1 neuroimmunity in  
1102 the era of antiretroviral therapy. *Neurobiol Dis.* 2010;37(3):542-8.
- 1103 18. Li Q, Barres BA. Microglia and macrophages in brain homeostasis and disease.  
1104 *Nature Reviews Immunology.* 2018;18(4):225-42.
- 1105 19. Bai R, Song C, Lv S, Chang L, Hua W, Weng W, et al. Role of microglia in HIV-  
1106 1 infection. *AIDS Research and Therapy.* 2023;20(1):16.
- 1107 20. Clay CC, Rodrigues DS, Ho YS, Fallert BA, Janatpour K, Reinhart TA, et al.  
1108 Neuroinvasion of fluorescein-positive monocytes in acute simian immunodeficiency  
1109 virus infection. *J Virol.* 2007;81(21):12040-8.
- 1110 21. Nowlin BT, Burdo TH, Midkiff CC, Salemi M, Alvarez X, Williams KC. SIV  
1111 encephalitis lesions are composed of CD163(+) macrophages present in the central  
1112 nervous system during early SIV infection and SIV-positive macrophages recruited  
1113 terminally with AIDS. *Am J Pathol.* 2015;185(6):1649-65.
- 1114 22. Campbell JH, Ratai E-M, Autissier P, Nolan DJ, Tse S, Miller AD, et al. Anti- $\alpha$ 4  
1115 Antibody Treatment Blocks Virus Traffic to the Brain and Gut Early, and Stabilizes CNS  
1116 Injury Late in Infection. *PLOS Pathogens.* 2014;10(12):e1004533.
- 1117 23. Thompson KA, Cherry CL, Bell JE, McLean CA. Brain cell reservoirs of latent  
1118 virus in presymptomatic HIV-infected individuals. *Am J Pathol.* 2011;179(4):1623-9.
- 1119 24. Borrajo A, Spuch C, Penedo MA, Olivares JM, Agís-Balboa RC. Important role  
1120 of microglia in HIV-1 associated neurocognitive disorders and the molecular pathways  
1121 implicated in its pathogenesis. *Ann Med.* 2021;53(1):43-69.
- 1122 25. Castellano P, Prevedel L, Eugenin EA. HIV-infected macrophages and  
1123 microglia that survive acute infection become viral reservoirs by a mechanism  
1124 involving Bim. *Scientific Reports.* 2017;7(1):12866.
- 1125 26. Chandrasekar AP, Cummins NW, Badley AD. The Role of the BCL-2 Family of  
1126 Proteins in HIV-1 Pathogenesis and Persistence. *Clin Microbiol Rev.* 2019;33(1).
- 1127 27. Hayes GM, Woodroffe MN, Cuzner ML. Microglia are the major cell type  
1128 expressing MHC class II in human white matter. *Journal of the Neurological Sciences.*  
1129 1987;80(1):25-37.
- 1130 28. Perlmutter LS, Scott SA, Barrón E, Chui HC. MHC class II-positive microglia in  
1131 human brain: Association with alzheimer lesions. *Journal of Neuroscience Research.*  
1132 1992;33(4):549-58.

- 1133 29. Sheffield LG, Berman NEJ. Microglial Expression of MHC Class II Increases in  
1134 Normal Aging of Nonhuman Primates. *Neurobiology of Aging*. 1998;19(1):47-55.
- 1135 30. Zöller T, Schneider A, Kleimeyer C, Masuda T, Potru PS, Pfeifer D, et al.  
1136 Silencing of TGF $\beta$  signalling in microglia results in impaired homeostasis. *Nature*  
1137 *Communications*. 2018;9(1):4011.
- 1138 31. Sandler NG, Bosinger SE, Estes JD, Zhu RT, Tharp GK, Boritz E, et al. Type I  
1139 interferon responses in rhesus macaques prevent SIV infection and slow disease  
1140 progression. *Nature*. 2014;511(7511):601-5.
- 1141 32. Vanderford TH, Slichter C, Rogers KA, Lawson BO, Obaede R, Else J, et al.  
1142 Treatment of SIV-infected sooty mangabeys with a type-I IFN agonist results in  
1143 decreased virus replication without inducing hyperimmune activation. *Blood*.  
1144 2012;119(24):5750-7.
- 1145 33. Jacquelin B, Petitjean G, Kunkel D, Liovat AS, Jochems SP, Rogers KA, et al.  
1146 Innate immune responses and rapid control of inflammation in African green monkeys  
1147 treated or not with interferon-alpha during primary SIVagm infection. *PLoS Pathog*.  
1148 2014;10(7):e1004241.
- 1149 34. Parhizkar S, Holtzman DM. APOE mediated neuroinflammation and  
1150 neurodegeneration in Alzheimer's disease. *Semin Immunol*. 2022;59:101594.
- 1151 35. Jordan CA, Watkins BA, Kufta C, Dubois-Dalcq M. Infection of brain microglial  
1152 cells by human immunodeficiency virus type 1 is CD4 dependent. *J Virol*.  
1153 1991;65(2):736-42.
- 1154 36. Lindwasser OW, Chaudhuri R, Bonifacino JS. Mechanisms of CD4  
1155 downregulation by the Nef and Vpu proteins of primate immunodeficiency viruses.  
1156 *Curr Mol Med*. 2007;7(2):171-84.
- 1157 37. Beignon AS, McKenna K, Skoberne M, Manches O, DaSilva I, Kavanagh DG,  
1158 et al. Endocytosis of HIV-1 activates plasmacytoid dendritic cells via Toll-like receptor-  
1159 viral RNA interactions. *J Clin Invest*. 2005;115(11):3265-75.
- 1160 38. Luban J. Innate immune sensing of HIV-1 by dendritic cells. *Cell Host Microbe*.  
1161 2012;12(4):408-18.
- 1162 39. Iwasaki A. Innate immune recognition of HIV-1. *Immunity*. 2012;37(3):389-98.
- 1163 40. Cros J, Cagnard N, Woollard K, Patey N, Zhang SY, Senechal B, et al. Human  
1164 CD14dim monocytes patrol and sense nucleic acids and viruses via TLR7 and TLR8  
1165 receptors. *Immunity*. 2010;33(3):375-86.
- 1166 41. Yona S, Kim KW, Wolf Y, Mildner A, Varol D, Breker M, et al. Fate mapping  
1167 reveals origins and dynamics of monocytes and tissue macrophages under

- 1168 homeostasis. *Immunity*. 2013;38(1):79-91.
- 1169 42. Veldhoen M, Hocking RJ, Atkins CJ, Locksley RM, Stockinger B. TGF $\beta$  in the  
1170 context of an inflammatory cytokine milieu supports de novo differentiation of IL-17-  
1171 producing T cells. *Immunity*. 2006;24(2):179-89.
- 1172 43. Tesmer LA, Lundy SK, Sarkar S, Fox DA. Th17 cells in human disease.  
1173 *Immunol Rev*. 2008;223:87-113.
- 1174 44. Gopalakrishnan RM, Aid M, Mercado NB, Davis C, Malik S, Geiger E, et al.  
1175 Increased IL-6 expression precedes reliable viral detection in the rhesus macaque  
1176 brain during acute SIV infection. *JCI Insight*. 2021;6(20).
- 1177 45. Cummins NW, Sainski-Nguyen AM, Natesampillai S, Aboulnasr F, Kaufmann S,  
1178 Badley AD. Maintenance of the HIV Reservoir Is Antagonized by Selective BCL2  
1179 Inhibition. *J Virol*. 2017;91(11).
- 1180 46. Cummins NW, Sainski AM, Dai H, Natesampillai S, Pang YP, Bren GD, et al.  
1181 Prime, Shock, and Kill: Priming CD4 T Cells from HIV Patients with a BCL-2 Antagonist  
1182 before HIV Reactivation Reduces HIV Reservoir Size. *J Virol*. 2016;90(8):4032-48.
- 1183 47. Prinz M, Masuda T, Wheeler MA, Quintana FJ. Microglia and Central Nervous  
1184 System-Associated Macrophages-From Origin to Disease Modulation. *Annu Rev*  
1185 *Immunol*. 2021;39:251-77.
- 1186 48. Wendimu MY, Hooks SB. Microglia Phenotypes in Aging and  
1187 Neurodegenerative Diseases. *Cells*. 2022;11(13).
- 1188 49. Fox HS, Niu M, Morsey BM, Lamberty BG, Emanuel K, Periyasamy P, et al.  
1189 Morphine suppresses peripheral responses and transforms brain myeloid gene  
1190 expression to favor neuropathogenesis in SIV infection. *Front Immunol*.  
1191 2022;13:1012884.
- 1192 50. Trease AJ, Niu M, Morsey B, Guda C, Byrareddy SN, Buch S, et al. Antiretroviral  
1193 therapy restores the homeostatic state of microglia in SIV-infected rhesus macaques.  
1194 *J Leukoc Biol*. 2022;112(5):969-81.
- 1195 51. Pietrowski MJ, Gabr AA, Kozlov S, Blum D, Halle A, Carvalho K. Glial Purinergic  
1196 Signaling in Neurodegeneration. *Front Neurol*. 2021;12:654850.
- 1197 52. Grubman A, Chew G, Ouyang JF, Sun G, Choo XY, McLean C, et al. A single-  
1198 cell atlas of entorhinal cortex from individuals with Alzheimer's disease reveals cell-  
1199 type-specific gene expression regulation. *Nature Neuroscience*. 2019;22(12):2087-97.
- 1200 53. Ruganzu JB, Peng X, He Y, Wu X, Zheng Q, Ding B, et al. Downregulation of  
1201 TREM2 expression exacerbates neuroinflammatory responses through TLR4-  
1202 mediated MAPK signaling pathway in a transgenic mouse model of Alzheimer's

- 1203 disease. *Mol Immunol.* 2022;142:22-36.
- 1204 54. Cardona AE, Pioro EP, Sasse ME, Kostenko V, Cardona SM, Dijkstra IM, et al.  
1205 Control of microglial neurotoxicity by the fractalkine receptor. *Nature Neuroscience.*  
1206 2006;9(7):917-24.
- 1207 55. Pettas S, Karagianni K, Kanata E, Chatziefstathiou A, Christoudia N,  
1208 Xanthopoulos K, et al. Profiling Microglia through Single-Cell RNA Sequencing over  
1209 the Course of Development, Aging, and Disease. *Cells.* 2022;11(15).
- 1210 56. Buttgereit A, Lelios I, Yu X, Vrohings M, Krakoski NR, Gautier EL, et al. Sall1  
1211 is a transcriptional regulator defining microglia identity and function. *Nature*  
1212 *Immunology.* 2016;17(12):1397-406.
- 1213 57. Butovsky O, Jedrychowski MP, Moore CS, Cialic R, Lanser AJ, Gabriely G, et  
1214 al. Identification of a unique TGF- $\beta$ -dependent molecular and functional signature in  
1215 microglia. *Nat Neurosci.* 2014;17(1):131-43.
- 1216 58. Gosselin D, Link VM, Romanoski CE, Fonseca GJ, Eichenfield DZ, Spann NJ,  
1217 et al. Environment drives selection and function of enhancers controlling tissue-  
1218 specific macrophage identities. *Cell.* 2014;159(6):1327-40.
- 1219 59. Spittau B, Dokalis N, Prinz M. The Role of TGF $\beta$  Signaling in Microglia  
1220 Maturation and Activation. *Trends in Immunology.* 2020;41(9):836-48.
- 1221 60. Sankowski R, Böttcher C, Masuda T, Geirsdottir L, Sagar, Sindram E, et al.  
1222 Mapping microglia states in the human brain through the integration of high-  
1223 dimensional techniques. *Nature Neuroscience.* 2019;22(12):2098-110.
- 1224 61. Geirsdottir L, David E, Keren-Shaul H, Weiner A, Bohlen SC, Neuber J, et al.  
1225 Cross-Species Single-Cell Analysis Reveals Divergence of the Primate Microglia  
1226 Program. *Cell.* 2019;179(7):1609-22.e16.
- 1227 62. Masuda T, Sankowski R, Staszewski O, Böttcher C, Amann L, Sagar, et al.  
1228 Spatial and temporal heterogeneity of mouse and human microglia at single-cell  
1229 resolution. *Nature.* 2019;566(7744):388-92.
- 1230 63. Croft NP, Smith SA, Pickering J, Sidney J, Peters B, Faridi P, et al. Most viral  
1231 peptides displayed by class I MHC on infected cells are immunogenic. *Proceedings of*  
1232 *the National Academy of Sciences.* 2019;116(8):3112-7.
- 1233 64. Barber SA, Herbst DS, Bullock BT, Gama L, Clements JE. Innate immune  
1234 responses and control of acute simian immunodeficiency virus replication in the central  
1235 nervous system. *Journal of NeuroVirology.* 2004;10(1):15-20.
- 1236 65. Alamar L, Gama L, Clements JE. Simian immunodeficiency virus infection in  
1237 the brain and lung leads to differential type I IFN signaling during acute infection. *J*

- 1238 Immunol. 2011;186(7):4008-18.
- 1239 66. Bosinger SE, Li Q, Gordon SN, Klatt NR, Duan L, Xu L, et al. Global genomic  
1240 analysis reveals rapid control of a robust innate response in SIV-infected sooty  
1241 mangabeys. *J Clin Invest*. 2009;119(12):3556-72.
- 1242 67. Echebli N, Tchitchek N, Dupuy S, Bruel T, Peireira Bittencourt Passaes C,  
1243 Bosquet N, et al. Stage-specific IFN-induced and IFN gene expression reveal  
1244 convergence of type I and type II IFN and highlight their role in both acute and chronic  
1245 stage of pathogenic SIV infection. *PLoS One*. 2018;13(1):e0190334.
- 1246 68. Roberts ES, Burudi EM, Flynn C, Madden LJ, Roinick KL, Watry DD, et al. Acute  
1247 SIV infection of the brain leads to upregulation of IL6 and interferon-regulated genes:  
1248 expression patterns throughout disease progression and impact on neuroAIDS. *J*  
1249 *Neuroimmunol*. 2004;157(1-2):81-92.
- 1250 69. Hernández JC, Stevenson M, Latz E, Urcuqui-Inchima S. HIV type 1 infection  
1251 up-regulates TLR2 and TLR4 expression and function in vivo and in vitro. *AIDS Res*  
1252 *Hum Retroviruses*. 2012;28(10):1313-28.
- 1253 70. Del Cornò M, Cappon A, Donninelli G, Varano B, Marra F, Gessani S. HIV-1  
1254 gp120 signaling through TLR4 modulates innate immune activation in human  
1255 macrophages and the biology of hepatic stellate cells. *J Leukoc Biol*. 2016;100(3):599-  
1256 606.
- 1257 71. Mandl JN, Barry AP, Vanderford TH, Kozyr N, Chavan R, Klucking S, et al.  
1258 Divergent TLR7 and TLR9 signaling and type I interferon production distinguish  
1259 pathogenic and nonpathogenic AIDS virus infections. *Nat Med*. 2008;14(10):1077-87.
- 1260 72. Henrick BM, Nag K, Yao XD, Drannik AG, Aldrovandi GM, Rosenthal KL. Milk  
1261 matters: soluble Toll-like receptor 2 (sTLR2) in breast milk significantly inhibits HIV-1  
1262 infection and inflammation. *PLoS One*. 2012;7(7):e40138.
- 1263 73. Henrick BM, Yao XD, Drannik AG, Abimiku A, Rosenthal KL. Soluble toll-like  
1264 receptor 2 is significantly elevated in HIV-1 infected breast milk and inhibits HIV-1  
1265 induced cellular activation, inflammation and infection. *Aids*. 2014;28(14):2023-32.
- 1266 74. Henrick BM, Yao XD, Rosenthal KL. HIV-1 Structural Proteins Serve as PAMPs  
1267 for TLR2 Heterodimers Significantly Increasing Infection and Innate Immune Activation.  
1268 *Front Immunol*. 2015;6:426.
- 1269 75. Duverger A, Wolschendorf F, Zhang M, Wagner F, Hatcher B, Jones J, et al. An  
1270 AP-1 binding site in the enhancer/core element of the HIV-1 promoter controls the  
1271 ability of HIV-1 to establish latent infection. *J Virol*. 2013;87(4):2264-77.
- 1272 76. Hoshino S, Konishi M, Mori M, Shimura M, Nishitani C, Kuroki Y, et al. HIV-1

- 1273 Vpr induces TLR4/MyD88-mediated IL-6 production and reactivates viral production  
1274 from latency. *Journal of Leukocyte Biology*. 2010;87(6):1133-43.
- 1275 77. Varin A, Decrion AZ, Sabbah E, Quivy V, Sire J, Van Lint C, et al. Synthetic Vpr  
1276 protein activates activator protein-1, c-Jun N-terminal kinase, and NF-kappaB and  
1277 stimulates HIV-1 transcription in promonocytic cells and primary macrophages. *J Biol*  
1278 *Chem*. 2005;280(52):42557-67.
- 1279 78. Liu R, Lin Y, Jia R, Geng Y, Liang C, Tan J, et al. HIV-1 Vpr stimulates NF-kB  
1280 and AP-1 signaling by activating TAK1. *Retrovirology*. 2014;11(1):45.
- 1281 79. Nixon CC, Mavigner M, Sampey GC, Brooks AD, Spagnuolo RA, Irlbeck DM,  
1282 et al. Systemic HIV and SIV latency reversal via non-canonical NF-kB signalling in vivo.  
1283 *Nature*. 2020;578(7793):160-5.
- 1284 80. Goldmann T, Wieghofer P, Jordão MJ, Prutek F, Hagemeyer N, Frenzel K, et al.  
1285 Origin, fate and dynamics of macrophages at central nervous system interfaces. *Nat*  
1286 *Immunol*. 2016;17(7):797-805.
- 1287 81. Prinz M, Erny D, Hagemeyer N. Ontogeny and homeostasis of CNS myeloid  
1288 cells. *Nature Immunology*. 2017;18(4):385-92.
- 1289 82. Nowlin BT, Wang J, Schafer JL, Autissier P, Burdo TH, Williams KC. Monocyte  
1290 subsets exhibit transcriptional plasticity and a shared response to interferon in SIV-  
1291 infected rhesus macaques. *Journal of Leukocyte Biology*. 2018;103(1):141-55.
- 1292 83. Ronning KE, Karlen SJ, Burns ME. Structural and functional distinctions of co-  
1293 resident microglia and monocyte-derived macrophages after retinal degeneration.  
1294 *Journal of Neuroinflammation*. 2022;19(1):299.
- 1295 84. Eales LJ, Farrant J, Helbert M, Pinching AJ. Peripheral blood dendritic cells in  
1296 persons with AIDS and AIDS related complex: loss of high intensity class II antigen  
1297 expression and function. *Clin Exp Immunol*. 1988;71(3):423-7.
- 1298 85. Polyak S, Chen H, Hirsch D, George I, Hershberg R, Sperber K. Impaired class  
1299 II expression and antigen uptake in monocytic cells after HIV-1 infection. *J Immunol*.  
1300 1997;159(5):2177-88.
- 1301 86. Kanazawa S, Okamoto T, Peterlin BM. Tat Competes with CIITA for the Binding  
1302 to P-TEFb and Blocks the Expression of MHC Class II Genes in HIV Infection.  
1303 *Immunity*. 2000;12(1):61-70.
- 1304 87. Stumptner-Cuvelette P, Morchoisne S, Dugast M, Le Gall S, Raposo G,  
1305 Schwartz O, et al. HIV-1 Nef impairs MHC class II antigen presentation and surface  
1306 expression. *Proceedings of the National Academy of Sciences*. 2001;98(21):12144-9.
- 1307 88. Williams DW, Veenstra M, Gaskill PJ, Morgello S, Calderon TM, Berman JW.



- 1308 Monocytes mediate HIV neuropathogenesis: mechanisms that contribute to HIV  
1309 associated neurocognitive disorders. *Curr HIV Res.* 2014;12(2):85-96.
- 1310 89. Castellano P, Prevedel L, Valdebenito S, Eugenin EA. HIV infection and latency  
1311 induce a unique metabolic signature in human macrophages. *Scientific Reports.*  
1312 2019;9(1):3941.
- 1313 90. Saylor D, Dickens AM, Sacktor N, Haughey N, Slusher B, Pletnikov M, et al.  
1314 HIV-associated neurocognitive disorder--pathogenesis and prospects for treatment.  
1315 *Nat Rev Neurol.* 2016;12(4):234-48.
- 1316 91. Abassi M, Morawski BM, Nakigozi G, Nakasujja N, Kong X, Meya DB, et al.  
1317 Cerebrospinal fluid biomarkers and HIV-associated neurocognitive disorders in HIV-  
1318 infected individuals in Rakai, Uganda. *J Neurovirol.* 2017;23(3):369-75.
- 1319 92. Jessen Krut J, Mellberg T, Price RW, Hagberg L, Fuchs D, Rosengren L, et al.  
1320 Biomarker evidence of axonal injury in neuroasymptomatic HIV-1 patients. *PLoS One.*  
1321 2014;9(2):e88591.
- 1322 93. Borda JT, Alvarez X, Mohan M, Hasegawa A, Bernardino A, Jean S, et al.  
1323 CD163, a marker of perivascular macrophages, is up-regulated by microglia in simian  
1324 immunodeficiency virus encephalitis after haptoglobin-hemoglobin complex  
1325 stimulation and is suggestive of breakdown of the blood-brain barrier. *Am J Pathol.*  
1326 2008;172(3):725-37.
- 1327 94. Fields JA, Ellis RJ. HIV in the cART era and the mitochondrial: immune interface  
1328 in the CNS. *Int Rev Neurobiol.* 2019;145:29-65.
- 1329 95. Fazeli PL, Crowe M, Ross LA, Wadley V, Ball K, Vance DE. Cognitive  
1330 Functioning in Adults Aging with HIV: A Cross-Sectional Analysis of Cognitive  
1331 Subtypes and Influential Factors. *J Clin Res HIV AIDS Prev.* 2014;1(4):155-69.
- 1332 96. Valcour V, Shikuma C, Shiramizu B, Watters M, Poff P, Selnes O, et al. Higher  
1333 frequency of dementia in older HIV-1 individuals: the Hawaii Aging with HIV-1 Cohort.  
1334 *Neurology.* 2004;63(5):822-7.
- 1335 97. Filgueira L, Larionov A, Lannes N. The Influence of Virus Infection on Microglia  
1336 and Accelerated Brain Aging. *Cells [Internet].* 2021; 10(7).
- 1337 98. Lew BJ, Schantell MD, O'Neill J, Morse B, Wang T, Ideker T, et al. Reductions  
1338 in Gray Matter Linked to Epigenetic HIV-Associated Accelerated Aging. *Cereb Cortex.*  
1339 2021;31(8):3752-63.
- 1340 99. Proskovec AL, Rezich MT, O'Neill J, Morse B, Wang T, Ideker T, et al.  
1341 Association of Epigenetic Metrics of Biological Age With Cortical Thickness. *JAMA*  
1342 *Netw Open.* 2020;3(9):e2015428.

- 1343 100. Gross AM, Jaeger PA, Kreisberg JF, Licon K, Jepsen KL, Khosroheidari M, et  
1344 al. Methylome-wide Analysis of Chronic HIV Infection Reveals Five-Year Increase in  
1345 Biological Age and Epigenetic Targeting of HLA. *Mol Cell*. 2016;62(2):157-68.
- 1346 101. Horvath S, Levine AJ. HIV-1 Infection Accelerates Age According to the  
1347 Epigenetic Clock. *J Infect Dis*. 2015;212(10):1563-73.
- 1348 102. Shiramizu B, Ananworanich J, Chalermchai T, Siangphoe U, Troelstrup D,  
1349 Shikuma C, et al. Failure to clear intra-monocyte HIV infection linked to persistent  
1350 neuropsychological testing impairment after first-line combined antiretroviral therapy.  
1351 *J Neurovirol*. 2012;18(1):69-73.
- 1352 103. Shikuma CM, Nakamoto B, Shiramizu B, Liang CY, DeGruttola V, Bennett K, et  
1353 al. Antiretroviral monocyte efficacy score linked to cognitive impairment in HIV. *Antivir  
1354 Ther*. 2012;17(7):1233-42.
- 1355 104. Krajewski S, James HJ, Ross J, Blumberg BM, Epstein LG, Gendelman HE, et  
1356 al. Expression of pro- and anti-apoptosis gene products in brains from paediatric  
1357 patients with HIV-1 encephalitis. *Neuropathology and Applied Neurobiology*.  
1358 1997;23(3):242-53.
- 1359 105. Campbell Grant R, To Rachel K, Spector Stephen A. TREM-1 Protects HIV-1-  
1360 Infected Macrophages from Apoptosis through Maintenance of Mitochondrial Function.  
1361 *mBio*. 2019;10(6):10.1128/mbio.02638-19.
- 1362 106. Sanchez-Moral L, Ràfols N, Martori C, Paul T, Téllez É, Sarrias MR.  
1363 Multifaceted Roles of CD5L in Infectious and Sterile Inflammation. *Int J Mol Sci*.  
1364 2021;22(8).
- 1365 107. Miyazaki T, Hirokami Y, Matsushashi N, Takatsuka H, Naito M. Increased  
1366 susceptibility of thymocytes to apoptosis in mice lacking AIM, a novel murine  
1367 macrophage-derived soluble factor belonging to the scavenger receptor cysteine-rich  
1368 domain superfamily. *J Exp Med*. 1999;189(2):413-22.
- 1369 108. Wishart CL, Spiteri AG, Locatelli G, King NJC. Integrating transcriptomic  
1370 datasets across neurological disease identifies unique myeloid subpopulations driving  
1371 disease-specific signatures. *Glia*. 2023;71(4):904-25.
- 1372 109. Hansen SG, Piatak M, Ventura AB, Hughes CM, Gilbride RM, Ford JC, et al.  
1373 Addendum: Immune clearance of highly pathogenic SIV infection. *Nature*.  
1374 2017;547(7661):123-4.
- 1375 110. Hansen SG, Piatak M, Jr., Ventura AB, Hughes CM, Gilbride RM, Ford JC, et  
1376 al. Immune clearance of highly pathogenic SIV infection. *Nature*. 2013;502(7469):100-  
1377 4.

- 1378 111. Venneti S, Bonne-Barkay D, Lopresti BJ, Bissel SJ, Wang G, Mathis CA, et al.  
1379 Longitudinal in vivo positron emission tomography imaging of infected and activated  
1380 brain macrophages in a macaque model of human immunodeficiency virus  
1381 encephalitis correlates with central and peripheral markers of encephalitis and areas  
1382 of synaptic degeneration. *Am J Pathol*. 2008;172(6):1603-16.
- 1383 112. Morsey B, Niu M, Dyavar SR, Fletcher CV, Lamberty BG, Emanuel K, et al.  
1384 Cryopreservation of microglia enables single-cell RNA sequencing with minimal effects  
1385 on disease-related gene expression patterns. *iScience*. 2021;24(4):102357.
- 1386 113. Hao Y, Hao S, Andersen-Nissen E, Mauck WM, 3rd, Zheng S, Butler A, et al.  
1387 Integrated analysis of multimodal single-cell data. *Cell*. 2021;184(13):3573-87.e29.
- 1388 114. Choudhary S, Satija R. Comparison and evaluation of statistical error models  
1389 for scRNA-seq. *Genome Biology*. 2022;23(1):27.
- 1390 115. Korsunsky I, Millard N, Fan J, Slowikowski K, Zhang F, Wei K, et al. Fast,  
1391 sensitive and accurate integration of single-cell data with Harmony. *Nature Methods*.  
1392 2019;16(12):1289-96.
- 1393 116. Boyle EI, Weng S, Gollub J, Jin H, Botstein D, Cherry JM, et al.  
1394 GO::TermFinder--open source software for accessing Gene Ontology information and  
1395 finding significantly enriched Gene Ontology terms associated with a list of genes.  
1396 *Bioinformatics*. 2004;20(18):3710-5.
- 1397 117. Wu T, Hu E, Xu S, Chen M, Guo P, Dai Z, et al. clusterProfiler 4.0: A universal  
1398 enrichment tool for interpreting omics data. *Innovation (Camb)*. 2021;2(3):100141.
- 1399 118. Qiu X, Mao Q, Tang Y, Wang L, Chawla R, Pliner HA, et al. Reversed graph  
1400 embedding resolves complex single-cell trajectories. *Nature Methods*.  
1401 2017;14(10):979-82.
- 1402 119. Trapnell C, Cacchiarelli D, Grimsby J, Pokharel P, Li S, Morse M, et al. The  
1403 dynamics and regulators of cell fate decisions are revealed by pseudotemporal  
1404 ordering of single cells. *Nature Biotechnology*. 2014;32(4):381-6.
- 1405
